# Supplementary material for: Developing and implementing a culturally informed FAmily Motivational Engagement Strategy (FAMES) to increase family engagement in first episode psychosis programs: mixed methods pilot study protocol
Source: PubMed Central journal article supplement — BMJ Open. 2020 Aug 26;10(8):e036907. doi: 10.1136/bmjopen-2020-036907 (PMC7451463; doi:10.1136/bmjopen-2020-036907), 2020-08-26
Supplement: bmjopen-2020-036907.draft_revisions.pdf [file bmjopen-2020-036907.draft_revisions.pdf]

# BMJ Open

BMJ Open is committed to open peer review. As part of this commitment we make the peer review history of every article we publish publicly available.

When an article is published we post the peer reviewers' comments and the authors' responses online. We also post the versions of the paper that were used during peer review. These are the versions that the peer review comments apply to.

The versions of the paper that follow are the versions that were submitted during the peer review process. They are not the versions of record or the final published versions. They should not be cited or distributed as the published version of this manuscript.

BMJ Open is an open access journal and the full, final, typeset and author-corrected version of record of the manuscript is available on our site with no access controls, subscription charges or pay-per-view fees (<http://bmjopen.bmj.com>).

If you have any questions on BMJ Open's open peer review process please email [info.bmjopen@bmj.com](mailto:info.bmjopen@bmj.com)

# BMJ Open

**Mixed-methods protocol for developing and implementing a culturally informed Family Motivational Engagement Strategy (FAMES) to increase family engagement in coordinated care programs.**

|                               |                                                                                                                                                                                                                                                                                                                                                                                                                                                                                                                                                                                                                                                                                  |
|-------------------------------|----------------------------------------------------------------------------------------------------------------------------------------------------------------------------------------------------------------------------------------------------------------------------------------------------------------------------------------------------------------------------------------------------------------------------------------------------------------------------------------------------------------------------------------------------------------------------------------------------------------------------------------------------------------------------------|
| Journal:                      | <i>BMJ Open</i>                                                                                                                                                                                                                                                                                                                                                                                                                                                                                                                                                                                                                                                                  |
| Manuscript ID                 | bmjopen-2020-036907                                                                                                                                                                                                                                                                                                                                                                                                                                                                                                                                                                                                                                                              |
| Article Type:                 | Protocol                                                                                                                                                                                                                                                                                                                                                                                                                                                                                                                                                                                                                                                                         |
| Date Submitted by the Author: | 10-Jan-2020                                                                                                                                                                                                                                                                                                                                                                                                                                                                                                                                                                                                                                                                      |
| Complete List of Authors:     | Oluwoye, Oladunni; Washington State University - Spokane, Elson S. Floyd College of Medicine<br>Dyck, Dennis; Washington State University - Spokane, Psychology<br>McPherson, Sterling; Washington State University - Spokane, Elson S. Floyd College of Medicine<br>Lewis-Fernández, Roberto; Columbia University College of Physicians and Surgeons, Department of Psychiatry<br>Compton, Michael; Columbia University College of Physicians and Surgeons,<br>McDonell, Michael; Washington State University Spokane Health Sciences, Elson S. Floyd College of Medicine<br>Cabassa, Leopoldo; Washington University in Saint Louis, George Warren Brown School of Social Work |
| Keywords:                     | MENTAL HEALTH, Schizophrenia & psychotic disorders < PSYCHIATRY, Community child health < PAEDIATRICS                                                                                                                                                                                                                                                                                                                                                                                                                                                                                                                                                                            |
|                               |                                                                                                                                                                                                                                                                                                                                                                                                                                                                                                                                                                                                                                                                                  |

SCHOLARONE™  
Manuscripts

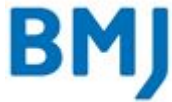

I, the Submitting Author has the right to grant and does grant on behalf of all authors of the Work (as defined in the below author licence), an exclusive licence and/or a non-exclusive licence for contributions from authors who are: i) UK Crown employees; ii) where BMJ has agreed a CC-BY licence shall apply, and/or iii) in accordance with the terms applicable for US Federal Government officers or employees acting as part of their official duties; on a worldwide, perpetual, irrevocable, royalty-free basis to BMJ Publishing Group Ltd ("BMJ") its licensees and where the relevant Journal is co-owned by BMJ to the co-owners of the Journal, to publish the Work in this journal and any other BMJ products and to exploit all rights, as set out in our [licence](#).

The Submitting Author accepts and understands that any supply made under these terms is made by BMJ to the Submitting Author unless you are acting as an employee on behalf of your employer or a postgraduate student of an affiliated institution which is paying any applicable article publishing charge ("APC") for Open Access articles. Where the Submitting Author wishes to make the Work available on an Open Access basis (and intends to pay the relevant APC), the terms of reuse of such Open Access shall be governed by a Creative Commons licence – details of these licences and which [Creative Commons](#) licence will apply to this Work are set out in our licence referred to above.

Other than as permitted in any relevant BMJ Author's Self Archiving Policies, I confirm this Work has not been accepted for publication elsewhere, is not being considered for publication elsewhere and does not duplicate material already published. I confirm all authors consent to publication of this Work and authorise the granting of this licence.

1  
2  
3 Mixed-methods protocol for developing and implementing a culturally informed **F**amily  
4 **M**otivational **E**ngagement **S**trategy (FAMES) to increase family engagement in coordinated care  
5 programs  
6  
7

8 \*Oladunni Oluwoye, PhD, CHES <sup>a</sup>  
9 [oladunni.oluwoye@wsu.edu](mailto:oladunni.oluwoye@wsu.edu); (509) 368-6805

10  
11 Dennis G. Dyck, PhD <sup>b</sup>  
12 [dyck@wsu.edu](mailto:dyck@wsu.edu)

13  
14 Sterling M. McPherson, PhD <sup>a</sup>  
15 [smcpherson05@wsu.edu](mailto:smcpherson05@wsu.edu)

16  
17 Roberto Lewis-Fernández, MD <sup>c</sup>  
18 [Roberto.Lewis@nyspi.columbia.edu](mailto:Roberto.Lewis@nyspi.columbia.edu)

19  
20 Michael T. Compton, MD, MPH <sup>c</sup>  
21 [mtc2176@cumc.columbia.edu](mailto:mtc2176@cumc.columbia.edu)

22  
23 Michael G. McDonell, PhD <sup>a</sup>  
24 [mmcdonell@wsu.edu](mailto:mmcdonell@wsu.edu)

25  
26 Leopoldo J. Cabassa, PhD, MSW <sup>d</sup>  
27 [ljbass@wustl.edu](mailto:ljbass@wustl.edu)

28  
29  
30  
31  
32 \*Corresponding Author

33  
34 <sup>a</sup> Department of Medical Education and Clinical Sciences, Elson S. Floyd College of Medicine,  
35 Washington State University, 412 E. Spokane Falls Blvd, Spokane WA 99202

36  
37 <sup>b</sup> Department of Psychology, Washington State University, PO Box 644820, Pullman WA,  
38 99164-4820

39  
40 <sup>c</sup> Department of Psychiatry, Columbia University College of Physicians and Surgeons, and New  
41 York State Psychiatric Institute, New York, NY, USA

42  
43 <sup>d</sup> George Warren Brown School of Social Work, Washington University in St. Louis, One  
44 Brookings Drive, Campus Box 1196, St. Louis MO, 63130

45  
46  
47  
48 Word count: 3659

49  
50  
51 Tables: 1

52  
53  
54 Figures: 2

55  
56  
57  
58  
59  
60  
References: 88

## ABSTRACT

**Introduction:** Despite the proven effectiveness of coordinated specialty care (CSC) programs for first-episode psychosis (FEP) in the United States, CSC programs often have low levels of engagement in family psychoeducation, and engagement of racial and ethnic minority family members is even lower than that for non-Latino white family members. The goal of this study is to develop and evaluate a culturally informed Family Motivational Engagement Strategy (FAMES) and implementation toolkit for CSC providers.

**Methods and analysis:** This protocol describes a mixed-methods, multi-phase study that blends intervention mapping and the Promoting Action on Research in Health Services framework to develop, modify, and pilot-test FAMES and an accompanying implementation toolkit. Phase 1 will convene a Stakeholder Advisory Committee to inform modifications based on findings from phase 1 and 2. During phase 1, we will also recruit approximately 200 family members to complete an online survey to assess barriers and motivation to engage in treatment. Phase 2 we will recruit five family members into a three-month trial of the modified FAMES and implementation toolkit. Results will guide the advisory committee in refining the intervention and implementation toolkit. Phase 3 will involve a 16-month non-randomized, stepped-wedge trial with 50 family members from five CSC programs in community-based mental health clinics to examine the acceptability, feasibility, and initial impact of FAMES and the implementation toolkit.

**Ethics and dissemination:** This study received Institutional Review Board approval from Washington State University, protocol #17812-001. Results will be disseminated via peer review publications, presentations at national and international conferences, and to local community mental health agencies and committees.

**Keywords:** *Community mental health, Coordinated specialty care, Family engagement, First-episode psychosis, Implementation strategies, Motivation*

**Trial registration:** *ClinicalTrials.gov, NCT04188366, registered 28 December 2019,*

### Strengths and limitations of this study

- This protocol demonstrates how to use a blend of intervention mapping and the PARIHS framework to develop, implement, and evaluate a culturally informed family engagement intervention and implementation toolkit.
- This study will examine the acceptability, feasibility, and initial impact of a family engagement intervention that addresses motivation as a mechanism for engagement in mental health services.
- If successful, the family engagement strategy can be utilized by community mental health clinics to increase engagement in services for youth and adults.

## INTRODUCTION

Coordinated specialty care (CSC) programs in the U.S. ameliorate psychiatric symptoms and improve functioning and quality of life among youth and young adults experiencing first-episode psychosis (FEP).<sup>1</sup> CSC programs feature evidence-based practices such as individual or multi-group family psychoeducation.<sup>2</sup> There is considerable evidence demonstrating that family psychoeducation is associated with increased medication adherence, reduced relapse and rehospitalization, and improved functional status and family management of psychosis.<sup>3-8</sup> Family members have a key role in facilitating care and their participation in treatment is often associated with higher treatment engagement of individuals with FEP, particularly among youth.<sup>9-15</sup> Despite evidence for the effectiveness of CSC programs and family psychoeducation, and the importance of family member involvement in mental health treatment, the implementation of family psychoeducation in CSC programs has been low and is one the most challenging components of CSC according to providers.<sup>16</sup> For instance, in a large clustered randomized trial of NAVIGATE, a CSC program for FEP, 69% of family members did not participate in family psychoeducation.<sup>17</sup> These findings also revealed that non-Hispanic Black and Hispanic family members engaged in treatment at lower rates than non-Hispanic whites. We need to better understand and systematically address factors and underlying mechanisms, that affect the successful implementation of family-based interventions in mental health settings.

Previous studies suggest that low motivation and logistical, perceptual, and cultural barriers hinder treatment engagement and subsequently limit successful implementation of family interventions like family psychoeducation.<sup>13,18-28</sup> Logistical barriers include lack of financial resources, transportation problems, and inadequate clinics operation hours.<sup>29-31</sup> Perceptual and cognitive barriers include lack of interest due to religious beliefs, substantial burden, and perceived

1  
2  
3 lack of benefit.<sup>23,26,32,33</sup> At the provider level, improving clinicians training in cultural competence  
4 and providing culturally sensitive care increases treatment engagement and retention, while also  
5  
6 mitigating cultural and perceptual barriers.<sup>33,34</sup> Although motivation has been identified as a  
7  
8 mechanism for improving treatment engagement and retention among individuals with serious  
9  
10 mental illnesses (e.g., schizophrenia),<sup>35,36</sup> research on engagement and family motivation has been  
11  
12 limited. One study found that lower motivation was associated with greater perception of treatment  
13  
14 barriers and lower engagement among family members of youth with conduct disorder.<sup>37</sup>  
15  
16  
17  
18

19 To address logistical, perceptual, and cultural barriers to engagement, several strategies  
20 and interventions have successfully improved family engagement for individuals with conduct  
21  
22 disorder,<sup>38</sup> substance use disorders,<sup>39-41</sup> and those who access school programs.<sup>42</sup> Several of these  
23  
24 studies have used techniques that enhance motivational and family engagement.<sup>38,43</sup> For example,  
25  
26 Nock and Kazdin developed the Participation Enhancement Intervention composed of three major  
27  
28 components: 1) describing the importance of treatment engagement, 2) motivational statements  
29  
30 about engagement, and 3) addressing engagement barriers.<sup>38</sup> In their randomized trial family  
31  
32 members receiving the intervention showed greater motivation and engagement than family  
33  
34 members in the control condition. Other strategies that have led to increased engagement are  
35  
36 telephone-based interventions addressing treatment barriers<sup>44,45</sup> and providing extrinsic motivators  
37  
38 (incentives) for family involvement in mental health care.<sup>42</sup>  
39  
40  
41  
42  
43

#### 44 *Study aims/objectives*

45  
46  
47 The overarching purpose of this project is to assess the feasibility and acceptability of a  
48  
49 brief provider-led FAMily Engagement Motivational Strategy (FAMES) and its accompanying  
50  
51 implementation toolkit, and to examine its initial impact. This project has three phases: 1) survey  
52  
53 family members regarding logistical, perceptual, and cultural barriers, and motivators that  
54  
55  
56  
57  
58  
59  
60



1  
2  
3 influence engagement in CSC programs for FEP to inform modifications; 2) refine FAMES and  
4 the implementation toolkit for use in CSC programs for FEP using findings from Aim 1 and with  
5 input from key stakeholders, such as clients with FEP and their family members, CSC providers,  
6 and CSC organizational leaders; and 3) examine the feasibility, acceptability, and preliminary  
7 impact of FAMES in five CSC programs using a stepped-wedge design.  
8  
9  
10  
11  
12  
13

## 14 **METHODS**

### 15 **Theoretical framework**

16  
17 This multi-site, mixed-methods project will be completed in three phases: 1) intervention  
18 development, 2) intervention modification, and 3) efficacy evaluation using a non-randomized  
19 stepped-wedge pilot trial design (Figure 1). We will apply core components of intervention  
20 mapping (IM) and the Promoting Action on Research in Health Services (PARIHS) framework, a  
21 collaborative implementation framework (Figure 1). IM is commonly used in implementation  
22 science to develop interventions and implementation strategies that are rooted in theory, build upon  
23 evidence, and incorporate stakeholder perspectives through an iterative process. IM is composed  
24 of six steps: 1) problem analysis (preliminary data), 2) review of theory-based methods and  
25 practical strategies, 3) development of the intervention, 4) modification of intervention methods  
26 and strategies, 5) development of the implementation plan, and 6) evaluation.<sup>46</sup> The PARIHS  
27 framework outlines factors necessary for the successful implementation of interventions into  
28 practice and has been extensively utilized to guide implementation. PARIHS is composed of three  
29 stages:<sup>47-51</sup> 1) the evidence stage gathers information related on stakeholder experiences, needs,  
30 and preferences to inform the intervention; 2) the context stage evaluates the acceptability,  
31 feasibility, and sustainability of the intervention among stakeholders; and 3) the facilitation stage  
32 is focused on the appropriateness of the intervention and provider skills.  
33  
34  
35  
36  
37  
38  
39  
40  
41  
42  
43  
44  
45  
46  
47  
48  
49  
50  
51  
52  
53  
54  
55  
56  
57  
58  
59  
60

1  
2  
3  
4  
5  
6  
7  
8  
9  
10  
11  
12  
13  
14  
15  
16  
17  
18  
19  
20  
21  
22  
23  
24  
25  
26  
27  
28  
29  
30  
31  
32  
33  
34  
35  
36  
37  
38  
39  
40  
41  
42  
43  
44  
45  
46  
47  
48  
49  
50  
51  
52  
53  
54  
55  
56  
57  
58  
59  
60

Insert Figure 1 about here

### **Intervention components**

FAMES will involve three distinct and revolving components - early, continuous, and motivational contact - that incorporate motivational techniques and the Diagnostic and Statistical Manual of Mental Disorders 5<sup>TH</sup> Edition (DSM-5) Cultural Formulation Interview (CFI).<sup>52-54</sup> The CFI will be used to identify the unique needs of family members within the context of their culture, enhance the provider-family relationship, and personalize treatment components of family psychoeducation.

*Early contact* by email, phone, or text message will occur 14, 7, and 2 days prior to the first scheduled orientation appointment for family members. To facilitate ongoing engagement, *continuous contact* between providers (e.g., a licensed mental health counselors, social workers, or case managers) and family members will be made 12 to 16 days after each family appointment. During the early and continuous contacts, providers inquire about potential barriers participation in family appointments and other CSC appointments for their loved one. Providers will assess social support systems and remind family members of upcoming appointments. The *motivational component* will occur in person once per month, for a duration of approximately 20 minutes immediately prior to the family appointment. Providers discuss the barriers that were identified during the early and continuous contacts, work with family members identify pragmatic and tangible solutions to these barriers (e.g., extrinsic motivations), and develop a plan to overcome these barriers. Providers will prompt family members to create motivational statements (e.g., intrinsic motivations) that are goal-driven, with an emphasis on overcoming these barriers and promoting continued engagement. During development and modification phases, we will identify and determine possible changes to the components and delivery of FAMES.

## Implementation toolkit components

During phases 1 and 2, we will develop an implementation toolkit, designed to be a resource for providers to facilitate the uptake and implementation of FAMES.<sup>55</sup> We anticipate that the FAMES implementation toolkit will utilize a combination of strategies (e.g., implementation guides, fidelity checklist, audit and feedback, technical assistance, internal or external facilitators) that can be amendable to a specific CSC program.<sup>56</sup>

## Patient and public involvement

Patients, family members, and other stakeholders were not involved to the research question, study design, and outcomes measured. However, during this phases 1 and 2, a Stakeholder Advisory Committee will be convened, which will include two family members who have experience with CSC programs for FEP, a CSC provider (e.g., a licensed mental health counselor, social worker, or case manager), a former client who graduated from a CSC program, and a CSC administrator. The Stakeholder Advisory Committee will meet via videoconference two to three times per year in phases 1 and phase 2 to aid in the modification of FAMES. Findings from all phases will be disseminated to community mental health agencies and patient and family advisory groups.

## Phase 1 – Intervention development

### *Design*

Based on previously collected and published data that informed IM step 1 (problem analysis),<sup>17</sup> Self-Determination Theory (SDT) was chosen as an overarching theoretical framework to ensure that the intervention's underlining mechanism of motivation is targeted by incorporating specific components, an approach consistent with IM step 2 (review of theory-based methods and practical strategies).<sup>57</sup> SDT focuses on three fundamental human needs: autonomy (choice),

1  
2  
3 competence (self-efficacy), and relatedness (belonging). These are linked to a continuum of  
4  
5 intrinsic motivations (internal drives to behave in a certain way such as core values and interests)  
6  
7 and extrinsic motivations (external sources that result in external rewards such as awards).<sup>58</sup>  
8  
9

10 Aligned with the evidence stage of the PARIHS framework, approximately 200 family  
11  
12 members of individuals with FEP will be recruited to complete a customized online REDCap or  
13  
14 paper survey instrument to identify family members' needs and barriers to treatment and  
15  
16 underlying proximal targets of change that may not have been previously identified. During IM  
17  
18 steps 2 and 3, the Stakeholder Advisory Committee will meet several times throughout phase 1 to  
19  
20 develop and discuss matrices of change objectives that are based upon data from IM step 1 and are  
21  
22 informed by survey findings. These meetings will build on the intervention components,  
23  
24 previously described, to ensure that intervention components adequately address needs, barriers,  
25  
26 and proximal targets of change identified from survey findings in a feasible and practical way.  
27  
28  
29

### 30 *Inclusion Criteria*

31  
32  
33 Survey eligibility criteria are: 1) aged 18 years or older; 2) family member (e.g., parent,  
34  
35 guardian, aunt/uncle, spouse, grandparent, sibling, close friend) of an individual who has or had  
36  
37 received services from an early intervention or CSC program for FEP in the US.  
38  
39

### 40 *Data collection*

41  
42 Surveys will be directly entered into REDCap through an online survey link. The survey  
43  
44 link will be distributed through national and local listservs and CSC programs. Potential  
45  
46 participants will be informed that the survey will take approximately 25 minutes to complete and  
47  
48 a unique return code will be provided for participants who are unable to complete the entire survey  
49  
50 in one sitting. A list of measures included in the survey are outlined in Table 1.<sup>59</sup>  
51  
52  
53

54 Insert Table 1 about here.  
55  
56  
57  
58  
59  
60

### *Data Analysis*

Descriptive analyses will be conducted to assess family members' pathways to care, satisfaction with treatment, motivation for participation, and suggested areas for improving CSC programs. Regression analyses will be utilized to identify important components to services and to assess racial/ethnic group differences in treatment barriers, satisfaction, and motivations.

## **Phase 2 – Modifications**

### *Design*

Aligned with the context stage (pre-evaluation) of the PARIHS, FAMES and the developed implementation toolkit will be studied across a three-month time period among five family members from one CSC program using a combined quantitative and qualitative mixed-methods approach.<sup>60</sup> Phase 2 will include the completion of IM step 4 (modification of intervention methods and strategies) and step 5 (development of the implementation plan) using an iterative process where the Stakeholder Advisory Committee will provide suggestions that will inform modifications to FAMES and development of the implementation toolkit. Regularly scheduled, audio-recorded Stakeholder Advisory Committee meetings will occur throughout this phase and include the review of quantitative and qualitative data summaries from the three-month study. Suggested modifications identified from summaries will be compiled for the Stakeholder Advisory Committee to rate based on level of importance and feasibility and used to stimulate discussions on steps to refine intervention objectives and components. Similar to phase 1 steps to inform intervention components, the Stakeholder Advisory Committee meetings in phase 2 will also develop the learning objectives for the implementation toolkit and connect these objectives to a theory-based method and practical strategy that will be refined based on feedback from providers.

### *Setting*

1  
2  
3 During phase 2, FAMES will be studied at one CSC program within Washington State's  
4 New Journeys network. New Journeys is a state-funded CSC program for FEP with nine locations  
5 distributed in community mental health clinics in rural and urban settings throughout Washington  
6 State.<sup>61</sup> Each New Journeys site employees four to eight mental health providers and currently  
7 serves a total of 300 clients with FEP. The New Journeys network serves approximately 55% racial  
8 and ethnic minorities; the average age of clients is 20 years; and 70% of clients reside with a family  
9 member or caregiver.

### 19 *Inclusion Criteria*

21 Eligibility for inclusion for family member participants in phase 2 include: 1) aged 18 years  
22 or older; 2) one family member (e.g., parent, guardian, aunt, uncle, spouse, grandparent, sibling,  
23 close friend) of an individual enrolled in a Washington State CSC program; and 3) has received  
24 no more than 3 months of services. Eligibility criteria for provider participants are 1) aged 18 years  
25 or older and 2) employed at a Washington State CSC program for more than two months.

### 33 *Data collection and outcomes*

35 To limit the burden on providers, self-reported measures for family member participants  
36 will be delivered directly to participants' mobile devices and email accounts using mobile and text  
37 message enabled capabilities linked to a customized REDCap database. Measures to assess  
38 satisfaction and practicality will be collected at baseline and monthly throughout the three-month  
39 study period. We will also measure the extent to which the intervention preliminarily impacts  
40 motivation. Measures to the assess toolkit, will be completed by provider participants will  
41 completed at baseline that will inform the implementation process in real-time and after the three-  
42 month study period that will be used by the Stakeholder Advisory Committee to improve the  
43 implementation toolkit. Separate qualitative interviews will be completed by family member and  
44  
45  
46  
47  
48  
49  
50  
51  
52  
53  
54  
55  
56  
57  
58  
59  
60

1  
2  
3 provider participants at months 1 and 3 to solicit opinions on what components may, or may not  
4 be working, suggestions for improvement, and any lessons learned. All Stakeholder Advisory  
5 Committee meetings will be audio-recorded to capture qualitative comments. Key concepts from  
6 quantitative and qualitative data will be presented during Stakeholder Advisory Committee  
7 meetings. Suggested improvements and action items will be rated by members on the Stakeholder  
8 Advisory Committee, based on feasibility and importance.<sup>62</sup> These ratings will stimulate  
9 Stakeholder Advisory Committee meeting discussion points that will modify FAMES. These data  
10 will help us make improvements to the intervention delivery in real-time.  
11  
12  
13  
14  
15  
16  
17  
18  
19  
20  
21

### 22 *Quantitative data analysis*

23  
24 Descriptive analyses will be performed to assess satisfaction, motivation, practicality and  
25 implementation process. The mean score of ratings on practicality will be calculated and  
26 presented to the Stakeholder Advisory Committee.  
27  
28  
29

### 30 *Qualitative data analysis*

31  
32 All interview recordings will be transcribed verbatim and imported into NVivo 11, a  
33 qualitative data management software, a directed content approach will inform data analysis.<sup>63,64</sup>  
34 Coding will focus on satisfaction and areas for improvement. Qualitative data gathered from  
35 family member and provider participants will be coded, summarized, and presented to the  
36 Stakeholder Advisory Committee. The meeting recordings will be translated into actionable plans  
37 that will be re-presented to the Stakeholder Advisory Committee. To increase rigor, we will use  
38 member checks to confirm findings, keep detailed notes from each meeting, and establish an audit  
39 trail.<sup>65,66</sup>  
40  
41  
42  
43  
44  
45  
46  
47  
48  
49

## 50 **Phase 3 – Stepped-wedge design pilot trial**

### 51 *Design*

1  
2  
3 IM step 6 and the context (evaluation) and facilitation (appropriateness and skills) stage of  
4 the PARIHS informs phase 3. During this phase, we will conduct a non-randomized stepped-  
5 wedge pilot trial in five CSC programs in Washington State using a combined quantitative and  
6 qualitative mixed-methods approach.<sup>60,67</sup> Each CSC program will represent a cluster and serve as  
7 its own control (Figure 2). A two-month implementation transition period will occur at each CSC  
8 program and during which providers will be introduced to the intervention using the  
9 implementation toolkits and trained to conduct FAMES. A 12-month open cohort design will be  
10 utilized to recruit approximately 50 family members during the study period.  
11  
12  
13  
14  
15  
16  
17  
18  
19  
20  
21

22 Insert Figure 2 about here.

### 23 *Setting and inclusion criteria*

24  
25  
26 In phase 3, FAMES will roll out sequentially in five CSC programs in Washington State's  
27 New Journeys network. Inclusion criteria for family members and provider participants in phase  
28 3 will be with the same as the inclusion criteria detailed in phase 2.  
29  
30  
31  
32

### 33 *Data collection and outcomes*

34  
35 The *primary outcomes* to be assessed are feasibility and acceptability of FAMES and the  
36 implementation toolkit. Primary outcome measures are described in detail in Table 1. The  
37 *secondary outcomes* will include measures related to the preliminary impact of FAMES on family  
38 engagement. These secondary outcomes will include engagement and retention, to be obtained by  
39 providers and entered directly into the REDCap database.<sup>68</sup> Motivation, family functioning, and  
40 cultural competence will also be captured using self-reported measures completed by family  
41 members. Primary and secondary outcome measures will be collected monthly during the control  
42 and intervention conditions. During the follow-up period for each program, family members will  
43 complete measures related to treatment motivation and family functioning at 1- and 3-months post-  
44  
45  
46  
47  
48  
49  
50  
51  
52  
53  
54  
55  
56  
57  
58  
59  
60



1  
2  
3 intervention completion. *Exploratory outcomes* include implementation outcomes (e.g.,  
4 adherence, exposure, quality, differentiation, responsiveness) will be tracked and assessed by  
5 external facilitators (i.e., research staff) throughout the implementation phase and during the  
6 intervention condition using audio/video recordings to monitor the delivery of FAMES across all  
7 CSC programs. At baseline and at 1-month follow-up provider participants will complete an  
8 organizational readiness measure that will assess key components of the PARIHS.<sup>51</sup> Providers will  
9 also be asked to complete an online self-report intervention component checklist in REDCap after  
10 each contact and session.<sup>69</sup>

11  
12 Sustainability and uptake will be tracked by research staff during the follow-up period at  
13 1- and 3-months post-intervention completion. Qualitative interviews will be completed by family  
14 member and provider participants at two iteration points during the study. The first will occur 1-  
15 month post-implementation and the second during the follow-up period, 1-month post-intervention  
16 completion to assess acceptability, feasibility, and key concepts of the PARIHS framework.

### 17 *Statistical power*

18  
19 Our choice of sample size (n=50) needed given the stepped-wedge design to ensure  
20 adequate power to preliminary detect the initial impact of FAMES on improving engagement and  
21 motivation <sup>70</sup>. Accounting for an incomplete stepped-wedge design project with five clusters (i.e.,  
22 community-based clinics) with an average recruitment of 10 family members per cluster, an intra  
23 cluster correlation of 0.10, and a significance level of 0.05, it is estimated that this will provide us  
24 with an estimated power of 0.84.

### 25 *Quantitative data analysis*

26  
27 At the completion of the stepped-wedge trial in phase 3, we will perform descriptive  
28 analyses on the primary and secondary outcomes. We will also compare mean differences in

1  
2  
3 satisfaction scores from control and intervention conditions across all programs, using independent  
4 sample t-tests. We will utilize generalized estimating equation techniques to assess differences in  
5 engagement by comparing the control and intervention conditions, while controlling for potential  
6 confounders (e.g., time, site). To assess the mediation effect of motivation, cultural sensitivity, and  
7 burden on the primary engagement and retention outcomes, we will path analytic modeling (e.g.,  
8 bootstrapped confidence intervals to evaluate indirect effects). If needed, we will use maximum  
9 likelihood, multiple imputation, or other sensitivity analyses, including “missing not at random”  
10 approaches, to account for missing data.<sup>71</sup>

### 21 *Qualitative data analysis*

22  
23  
24 The phase 3 qualitative analysis will also use key concepts derived from the SDT (e.g.,  
25 autonomy, competence, relatedness, extrinsic and intrinsic motivations). Areas related to  
26 acceptability (i.e., satisfaction) will be utilized to develop and operationalize an initial coding  
27 scheme for data obtained from family member participants. Key concepts from the PARIHS  
28 framework such as organizational fit, relevance, range of flexibility, and style will be used to  
29 develop and operationalize the initial coding scheme for data obtained from provider participants.<sup>72</sup>  
30 Coding and analysis will be conducted independently by two coders through a series of iterative  
31 readings, noting text that corresponds to initial codes.<sup>66,73,74</sup> A kappa of .8 will be required for  
32 coders to code independently and codes will be continuously refined.<sup>75</sup> Notes will be used to  
33 develop a final codebook. To guard against biases of directive content analysis, an audit trail—  
34 documenting analytical decisions, analyzing cases that did not fit our coding scheme, and  
35 generating new codes not present in initial codebooks—will be maintained.<sup>65</sup>

### 51 *Mixed-methods integration*

1  
2  
3 A thematic matrix will integrate qualitative and quantitative data using a side-by-side  
4 comparison to examine feasibility, acceptability, and implementation outcomes.<sup>76-78</sup> We will  
5 answer questions such as: will the qualitative data collected from family member participants  
6 match the quantitative data collected regarding satisfaction and engagement? Qualitative data  
7 collected from provider participants using the PARIHS framework will be used to explain  
8 quantitative data collected on fidelity measures. Barriers and facilitators identified by family  
9 members and providers will identify similarities and differences between these stakeholder groups  
10 that will be linked to provide further explanation and to help contextualize results.  
11  
12  
13  
14  
15  
16  
17  
18  
19  
20

## 21 **DISCUSSION**

22  
23  
24 Despite previous research on engagement interventions in other populations and settings,  
25 little is known about strategies to engage family members in the context of CSC programs.  
26 Research has also suggested inequities in utilization of evidence-based interventions (e.g., family  
27 psychoeducation) among racial and ethnic minorities that directly impacts successful  
28 implementation. We will utilize a mixed-methods approach throughout the study to meld core  
29 components of IM and the PARIHS framework to develop, implement, and evaluate the culturally  
30 informed FAMES and implementation toolkit to address these inequities; evaluation will focus on  
31 acceptability, feasibility, and initial impact. Very little research has systematically utilized  
32 implementation science to address inequities in service utilization related to race and ethnicity  
33 within community mental health clinics. The study protocol described will actively identify and  
34 modify strategies to address logistical and cultural barriers that contribute to these inequities at the  
35 family, provider, and organizational levels. By utilizing a rigorous mixed-methods approach, this  
36 study will also provide a roadmap for implementation and local adaptation that may contribute  
37 important knowledge to the field of implementation science.  
38  
39  
40  
41  
42  
43  
44  
45  
46  
47  
48  
49  
50  
51  
52  
53  
54  
55  
56  
57  
58  
59  
60

1  
2  
3 This study has several strengths, including the unique components of FAMES that will  
4 incorporate the DSM-5 CFI, which has only been previously focused on the assessment of  
5 individuals will now be tailored for families. This will allow clinicians to integrate culturally  
6 sensitive information to increase our understanding of family-related motivators related to  
7 treatment and that can then be incorporated into treatment planning for all racial and ethnic groups.  
8 The utilization of a stepped-wedge design provides the opportunity to offer FAMES to all CSC  
9 programs included in the study. It also presents an additional opportunity to assess whether  
10 FAMES has the potential to re-engage family members who over time have disengaged. In light  
11 of these strengths and potential impacts, family members' participation may be limited for  
12 programs that receive FAMES later in the trial. We will monitor family member participation  
13 during the control period with monthly program check-ins. As a pilot study, it is important to note  
14 that overall findings are limited by sample size and generalizability. However, this pilot project  
15 includes six CSC programs in rural and urban settings that will contribute to the iterative process  
16 of refining FAMES and its implementation various settings.  
17  
18  
19  
20  
21  
22  
23  
24  
25  
26  
27  
28  
29  
30  
31  
32  
33  
34

35 As the mental health field seeks to better understand motivations toward treatment in order  
36 to improve engagement and retention in CSC programs, this study will explore how to effectively  
37 engage and motivate families from various racial and ethnic groups. If successful, our findings  
38 will influence the scale up of FAMES to other CSC programs, while also potentially improving  
39 family engagement in other mental health services.  
40  
41  
42  
43  
44  
45  
46  
47  
48  
49  
50  
51  
52  
53  
54  
55  
56  
57  
58  
59  
60

**Ethics approval**

Ethics approvals for this study were obtained from the Washington State University Institutional Review Board.

**Patient consent for publication**

Not applicable.

**Competing interests**

The authors declare that they have no competing interests.

**Funding**

This project is funded and supported by the National Institute of Mental Health K01MH117457 awarded to OO. The content is solely the responsibility of the authors and does not necessarily represent the official views of the funding agency.

**Authors' contributions**

OO developed the concept, study design, and drafted the first version of the study protocol. DGD, SMM, RLF, MTC, MGM, and LJC contributed to the study design and revised subsequent versions of the study protocol. All authors have read and approved the final manuscript.

**Acknowledgements**

We acknowledge and thank the following partners and advisors for their integral assistance in developing and implementing this study: Washington Health Care Authority.

**Author Information****Affiliations**

*Elson S. Floyd College of Medicine, Washington State University, Spokane, WA, USA*

Oladunni Oluwoye, Sterling M. McPherson, & Michael G. McDonell

*Department of Psychology, Washington State University, Pullman, USA*

Dennis G. Dyck

*Columbia University College of Physicians and Surgeons, and New York State Psychiatric Institute, New York, NY, USA*

Roberto Lewis-Fernández & Michael T. Compton

*George Warren Brown School of Social Work, Washington University, St. Louis, MO, USA*

Leopoldo J. Cabassa

## REFERENCES

1. Kane JM, Robinson DG, Schooler NR, et al. Comprehensive versus usual community care for first-episode psychosis: 2-year outcomes from the NIMH RAISE early treatment program. *Am J Psychiatry*. 2015;173(4):362-372.
2. Wright A, Browne J, Mueser KT, Cather C. Evidence-based psychosocial treatment for individuals with early psychosis. *Child and Adolescent Psychiatric Clinics*. 2019.
3. R McFarlane W, Lynch S, Melton R. Family psychoeducation in clinical high risk and first-episode psychosis. *Adolesc Psychiatry*. 2012;2(2):182-194.
4. Petrakis M, Oxley J, Bloom H. Carer psychoeducation in first-episode psychosis: Evaluation outcomes from a structured group programme. *Int J Soc Psychiatry*. 2013;59(4):391-397.
5. Coldham E, Addington J, Addington D. Medication adherence of individuals with a first episode of psychosis. *Acta Psychiatr Scand*. 2002;106(4):286-290.
6. Dixon L, Adams C, Lucksted A. Update on family psychoeducation for schizophrenia. *Schizophr Bull*. 2000;26(1):5.
7. Kreyenbuhl J, Nossel IR, Dixon LB. Disengagement from mental health treatment among individuals with schizophrenia and strategies for facilitating connections to care: A review of the literature. *Schizophr Bull*. 2009;35(4):696-703. doi: 10.1093/schbul/sbp046 [doi].
8. Dyck DG, Short RA, Hendryx MS, et al. Management of negative symptoms among patients with schizophrenia attending multiple-family groups. *Psychiatric services*. 2000;51(4):513-519.

- 1  
2  
3 9. Addington J, Collins A, McCleery A, Addington D. The role of family work in early  
4  
5 psychosis. *Schizophr Res*. 2005;79(1):77-83.  
6  
7  
8  
9 10. Marino L, Nossel I, Choi JC, et al. The RAISE connection program for early psychosis:  
10  
11 Secondary outcomes and mediators and moderators of improvement. *J Nerv Ment Dis*.  
12  
13 2015;203(5):365-371. doi: 10.1097/NMD.0000000000000293 [doi].  
14  
15  
16  
17 11. Conus P, Lambert M, Cotton S, Bonsack C, McGorry PD, Schimmelmann BG. Rate and  
18  
19 predictors of service disengagement in an epidemiological first-episode psychosis cohort.  
20  
21 *Schizophr Res*. 2010;118(1):256-263.  
22  
23  
24  
25 12. De Haan L, Peters B, Dingemans P, Wouters L, Linszen D. Attitudes of patients toward the  
26  
27 first psychotic episode and the start of treatment. *Schizophr Bull*. 2002;28(3):431-442.  
28  
29  
30  
31 13. Compton MT. Barriers to initial outpatient treatment engagement following first  
32  
33 hospitalization for a first episode of nonaffective psychosis: A descriptive case series. *J*  
34  
35 *Psychiatr Pract*. 2005;11(1):62-69. doi: 00131746-200501000-00010 [pii].  
36  
37  
38  
39 14. Compton MT, Esterberg ML, Druss BG, Walker EF, Kaslow NJ. A descriptive study of  
40  
41 pathways to care among hospitalized urban african american first-episode schizophrenia-  
42  
43 spectrum patients. *Soc Psychiatry Psychiatr Epidemiol*. 2006;41(7):566-573.  
44  
45  
46  
47 15. Oluwoye O, Cheng SC, Fraser E, Stokes B, McDonnell MG. Family experiences prior to the  
48  
49 initiation of care for first-episode psychosis: A meta-synthesis of qualitative studies. *J Child Fam*  
50  
51 *Stud*. 2019:1-12.  
52  
53  
54  
55  
56  
57  
58  
59  
60

- 1  
2  
3 16. Addington J, Burnett P. Working with families in the early stages of psychosis.  
4  
5 *Psychological interventions in early psychosis.A treatment handbook*. 2004:99-116.  
6  
7  
8  
9 17. Oluwoye O, Stiles B, Monroe-DeVita M, et al. Racial-ethnic disparities in first-episode  
10  
11 psychosis treatment outcomes from the RAISE-ETP study. *Psychiatric Services*.  
12  
13 2018;69(11):1138-1145.  
14  
15  
16  
17 18. Addington J, Heinssen RK, Robinson DG, et al. Duration of untreated psychosis in  
18  
19 community treatment settings in the united states. *Psychiatric Services*. 2015;66(7):753-756.  
20  
21  
22  
23 19. Loebel AD, Lieberman JA, Alvir JM, Mayerhoff DI, Geisler SH, Szymanski SR. Duration of  
24  
25 psychosis and outcome in first-episode schizophrenia. *Am J Psychiatry*. 1992;149(9):1183.  
26  
27  
28  
29 20. Harrigan SM, McGorry P, Krstev H. Does treatment delay in first-episode psychosis really  
30  
31 matter? *Psychol Med*. 2003;33(01):97-110.  
32  
33  
34  
35 21. Black K, Peters L, Rui Q, Milliken H, Whitehorn D, Kopala L. Duration of untreated  
36  
37 psychosis predicts treatment outcome in an early psychosis program. *Schizophr Res*.  
38  
39 2001;47(2):215-222.  
40  
41  
42  
43 22. Morgan C, Abdul-Al R, Lappin JM, et al. Clinical and social determinants of duration of  
44  
45 untreated psychosis in the AESOP first-episode psychosis study. *Br J Psychiatry*. 2006;189:446-  
46  
47 452. doi: 189/5/446 [pii].  
48  
49  
50  
51 23. Compton MT, Goulding SM, Gordon TL, Weiss PS, Kaslow NJ. Family-level predictors and  
52  
53 correlates of the duration of untreated psychosis in african american first-episode patients.  
54  
55 *Schizophr Res*. 2009;115(2):338-345.  
56  
57  
58  
59  
60



- 1  
2  
3 24. Commander M, Cochrane R, Sashidharan S, Akilu F, Wildsmith E. Mental health care for  
4  
5 asian, black and white patients with non-affective psychoses: Pathways to the psychiatric  
6  
7 hospital, in-patient and after-care. *Soc Psychiatry Psychiatr Epidemiol*. 1999;34(9):484-491.  
8  
9  
10  
11 25. Lucksted A, Essock SM, Stevenson J, et al. Client views of engagement in the RAISE  
12  
13 connection program for early psychosis recovery. *Psychiatric Services*. 2015;66(7):699-704.  
14  
15  
16  
17 26. Dixon L, McFarlane WR, Lefley H, et al. Evidence-based practices for services to families of  
18  
19 people with psychiatric disabilities. *Psychiatric services*. 2001;52(7):903-910.  
20  
21  
22  
23 27. McKay MM, Bannon WM, Jr. Engaging families in child mental health services. *Child*  
24  
25 *Adolesc Psychiatr Clin N Am*. 2004;13(4):905-21, vii. doi: 10.1016/j.chc.2004.04.001 [doi].  
26  
27  
28  
29 28. Barnett ML, Davis EM, Callejas LM, et al. The development and evaluation of a natural  
30  
31 helpers' training program to increase the engagement of urban, latina/o families in parent-child  
32  
33 interaction therapy. *Children and Youth Services Review*. 2016;65:17-25.  
34  
35  
36  
37 29. Spoth R, Redmond C. Research on family engagement in preventive interventions: Toward  
38  
39 improved use of scientific findings in primary prevention practice. *The Journal of Primary*  
40  
41 *Prevention*. 2000;21(2):267-284.  
42  
43  
44  
45 30. Ofonedu ME, Belcher HM, Budhathoki C, Gross DA. Understanding barriers to initial  
46  
47 treatment engagement among underserved families seeking mental health services. *J Child Fam*  
48  
49 *Stud*. 2017;26(3):863-876.  
50  
51  
52  
53 31. Scheppers E, Van Dongen E, Dekker J, Geertzen J, Dekker J. Potential barriers to the use of  
54  
55 health services among ethnic minorities: A review. *Fam Pract*. 2006;23(3):325-348.  
56  
57  
58  
59  
60

- 1  
2  
3 32. Compton MT, Kaslow NJ, Walker EF. Observations on parent/family factors that may  
4 influence the duration of untreated psychosis among african american first-episode  
5  
6 influence the duration of untreated psychosis among african american first-episode  
7  
8 schizophrenia-spectrum patients. *Schizophr Res*. 2004;68(2):373-385.  
9  
10  
11 33. Fisher TL, Burnet DL, Huang ES, Chin MH, Cagney KA. Cultural leverage: Interventions  
12 using culture to narrow to narrow racial disparities in health care. *Medical Care Research and*  
13  
14 *Review*. 2007;64(5\_suppl):243S-282S.  
15  
16  
17  
18 34. Cabassa LJ, Druss B, Wang Y, Lewis-Fernández R. Collaborative planning approach to  
19 inform the implementation of a healthcare manager intervention for hispanics with serious  
20  
21 inform the implementation of a healthcare manager intervention for hispanics with serious  
22  
23 mental illness: A study protocol. *Implementation Science*. 2011;6(1):80.  
24  
25  
26  
27 35. Jochems EC, Duivenvoorden HJ, van Dam A, van der Feltz-Cornelis, Christina M, Mulder  
28  
29 CL. Motivation, treatment engagement and psychosocial outcomes in outpatients with severe  
30  
31 mental illness: A test of Self-Determination theory. *International journal of methods in*  
32  
33 *psychiatric research*. 2017;26(3):e1537.  
34  
35  
36  
37 36. Jochems EC, Mulder CL, van Dam A, et al. Motivation and treatment engagement  
38  
39 intervention trial (MotivaTe-IT): The effects of motivation feedback to clinicians on treatment  
40  
41 engagement in patients with severe mental illness. *BMC Psychiatry*. 2012;12(1):209.  
42  
43  
44  
45 37. Nock MK, Ferriter C. Parent management of attendance and adherence in child and  
46  
47 adolescent therapy: A conceptual and empirical review. *Clin Child Fam Psychol Rev*.  
48  
49 2005;8(2):149-166.  
50  
51  
52  
53  
54  
55  
56  
57  
58  
59  
60

- 1  
2  
3 38. Nock MK, Kazdin AE. Randomized controlled trial of a brief intervention for increasing  
4 participation in parent management training. *J Consult Clin Psychol*. 2005;73(5):872.  
5  
6  
7  
8  
9 39. Mullins SM, Suarez M, Ondersma SJ, Page MC. The impact of motivational interviewing on  
10 substance abuse treatment retention: A randomized control trial of women involved with child  
11 welfare. *J Subst Abuse Treat*. 2004;27(1):51-58.  
12  
13  
14  
15  
16  
17 40. Szapocznik J, Perez-Vidai A, Brickman AL, et al. Engaging adolescent drug abusers and  
18 their families in treatment: A strategic structural systems approach. *Annual Review of Addictions*  
19 *Research and Treatment*. 1991;1(C):331-336.  
20  
21  
22  
23  
24  
25 41. Santisteban DA, Szapocznik J, Perez-Vidal A, Kurtines WM, Murray EJ, LaPerriere A.  
26 Efficacy of intervention for engaging youth and families into treatment and some variables that  
27 may contribute to differential effectiveness. *Journal of family psychology*. 1996;10(1):35.  
28  
29  
30  
31  
32  
33 42. Heinrichs N. The effects of two different incentives on recruitment rates of families into a  
34 prevention program. *Journal of Primary Prevention*. 2006;27(4):345-365.  
35  
36  
37  
38  
39 43. Grote NK, Swartz HA, Geibel SL, Zuckoff A, Houck PR, Frank E. A randomized controlled  
40 trial of culturally relevant, brief interpersonal psychotherapy for perinatal depression. *Psychiatric*  
41 *Services*. 2009;60(3):313-321.  
42  
43  
44  
45  
46  
47 44. McKay MM, Hibbert R, Hoagwood K, et al. Integrating evidence-based engagement  
48 interventions into "real world" child mental health settings. *Brief Treatment and Crisis*  
49 *Intervention*. 2004;4(2):177.  
50  
51  
52  
53  
54  
55  
56  
57  
58  
59  
60

- 1  
2  
3 45. McKay MM, McCadam K, Gonzales JJ. Addressing the barriers to mental health services for  
4  
5 inner city children and their caretakers. *Community Ment Health J*. 1996;32(4):353-361.  
6  
7  
8  
9 46. Bartholomew LK, Parcel GS, Kok G. Intervention mapping: A process for developing theory  
10  
11 and evidence-based health education programs. *Health Education & Behavior*. 1998;25(5):545-  
12  
13 563.  
14  
15  
16  
17 47. Rycroft-Malone J. The PARIHS framework—A framework for guiding the implementation  
18  
19 of evidence-based practice. *J Nurs Care Qual*. 2004;19(4):297-304.  
20  
21  
22  
23 48. Kitson AL, Rycroft-Malone J, Harvey G, McCormack B, Seers K, Titchen A. Evaluating the  
24  
25 successful implementation of evidence into practice using the PARIHS framework: Theoretical  
26  
27 and practical challenges. *Implementation science*. 2008;3(1):1.  
28  
29  
30  
31 49. Rycroft-Malone J, Bucknall T. *Models and frameworks for implementing evidence-based*  
32  
33 *practice: Linking evidence to action*. Vol 2. John Wiley & Sons; 2011.  
34  
35  
36  
37 50. Ullrich PM, Sahay A, Stetler CB. Use of implementation theory: A focus on PARIHS.  
38  
39 *Worldviews on Evidence-Based Nursing*. 2014;11(1):26-34.  
40  
41  
42  
43 51. Stetler CB, Damschroder LJ, Helfrich CD, Hagedorn HJ. A guide for applying a revised  
44  
45 version of the PARIHS framework for implementation. *Implementation Science*. 2011;6(1):99.  
46  
47  
48  
49 52. Lewis-Fernández R, Aggarwal NK, Lam PC, et al. Feasibility, acceptability and clinical  
50  
51 utility of the cultural formulation interview: Mixed-methods results from the DSM-5  
52  
53 international field trial. *The British Journal of Psychiatry*. 2017;210(4):290-297.  
54  
55  
56  
57  
58  
59  
60

- 1  
2  
3 53. Aggarwal NK, Desilva R, Nicasio AV, Boiler M, Lewis-Fernández R. Does the cultural  
4 formulation interview for the fifth revision of the diagnostic and statistical manual of mental  
5 disorders (DSM-5) affect medical communication? A qualitative exploratory study from the new  
6 york site. *Ethn Health*. 2015;20(1):1-28.  
7  
8  
9  
10  
11  
12  
13 54. Lewis-Fernández R, Aggarwal NK, Bäärnhielm S, et al. Culture and psychiatric evaluation:  
14 Operationalizing cultural formulation for DSM-5. *Psychiatry: Interpersonal and biological*  
15 *processes*. 2014;77(2):130-154.  
16  
17  
18  
19  
20  
21 55. Hempel S, O'Hanlon C, Lim YW, Danz M, Larkin J, Rubenstein L. Spread tools: A  
22 systematic review of components, uptake, and effectiveness of quality improvement toolkits.  
23 *Implementation Science*. 2019;14(1):83.  
24  
25  
26  
27  
28  
29 56. Powell BJ, Beidas RS, Lewis CC, et al. Methods to improve the selection and tailoring of  
30 implementation strategies. *The journal of behavioral health services & research*.  
31 2017;44(2):177-194.  
32  
33  
34  
35  
36  
37 57. Deci EL, Ryan RM. Self-determination theory. *Handbook of theories of social psychology*.  
38 2011;1(2011):416-433.  
39  
40  
41  
42  
43 58. Ryan RM, Deci EL. Self-determination theory and the facilitation of intrinsic motivation,  
44 social development, and well-being. *American psychologist*. 2000;55(1):68-78.  
45  
46  
47  
48  
49 59. Harris PA, Taylor R, Thielke R, Payne J, Gonzalez N, Conde JG. Research electronic data  
50 capture (REDCap)—a metadata-driven methodology and workflow process for providing  
51 translational research informatics support. *J Biomed Inform*. 2009;42(2):377-381.  
52  
53  
54  
55  
56  
57  
58  
59  
60

- 1  
2  
3 60. Palinkas LA, Aarons GA, Horwitz S, Chamberlain P, Hurlburt M, Landsverk J. Mixed  
4 method designs in implementation research. *Administration and Policy in Mental Health and*  
5  
6 *Mental Health Services Research*. 2011;38(1):44-53.  
7  
8  
9  
10  
11 61. Oluwoye O, Reneau H, Stokes B, et al. Preliminary evaluation of washington state's early  
12 intervention program for first-episode psychosis. *Psychiatric Services*. 2019:appi. ps.  
13 201900199.  
14  
15  
16  
17  
18  
19 62. Waltz TJ, Powell BJ, Matthieu MM, et al. Use of concept mapping to characterize  
20 relationships among implementation strategies and assess their feasibility and importance:  
21 Results from the expert recommendations for implementing change (ERIC) study.  
22  
23 *Implementation Science*. 2015;10(1):109.  
24  
25  
26  
27  
28  
29  
30 63. Saldaña J. *The coding manual for qualitative researchers*. Sage; 2015.  
31  
32  
33 64. Hsieh H, Shannon SE. Three approaches to qualitative content analysis. *Qual Health Res*.  
34 2005;15(9):1277-1288.  
35  
36  
37  
38  
39 65. Padgett DK. *Qualitative methods in social work research*. Vol 36. Sage Publications; 2016.  
40  
41  
42 66. Miles MB, Huberman AM. *Qualitative data analysis: An expanded sourcebook*. sage; 1994.  
43  
44  
45  
46 67. Proctor EK, Knudsen KJ, Fedoravicius N, Hovmand P, Rosen A, Perron B. Implementation  
47 of evidence-based practice in community behavioral health: Agency director perspectives.  
48  
49 *Administration and Policy in Mental Health and Mental Health Services Research*.  
50 2007;34(5):479-488.  
51  
52  
53  
54  
55  
56  
57  
58  
59  
60

- 1  
2  
3 68. Ryan RM, Plant RW, O'Malley S. Initial motivations for alcohol treatment: Relations with  
4 patient characteristics, treatment involvement, and dropout. *Addict Behav.* 1995;20(3):279-297.  
5  
6  
7  
8  
9 69. Feely M, Seay KD, Lanier P, Auslander W, Kohl PL. Measuring fidelity in research studies:  
10 A field guide to developing a comprehensive fidelity measurement system. *Child Adolescent Soc*  
11 *Work J.* 2018;35(2):139-152.  
12  
13  
14  
15  
16  
17 70. Hemming K, Taljaard M. Sample size calculations for stepped wedge and cluster randomised  
18 trials: A unified approach. *J Clin Epidemiol.* 2016;69:137-146.  
19  
20  
21  
22  
23 71. McPherson S, Barbosa-Leiker C, Mamey MR, McDonell M, Enders CK, Roll J. A 'missing  
24 not at random'(MNAR) and 'missing at random'(MAR) growth model comparison with a  
25 buprenorphine/naloxone clinical trial. *Addiction.* 2015;110(1):51-58.  
26  
27  
28  
29  
30  
31 72. Kitson A, Harvey G, McCormack B. Enabling the implementation of evidence based  
32 practice: A conceptual framework. *BMJ Quality & Safety.* 1998;7(3):149-158.  
33  
34  
35  
36  
37 73. Emerson RM, Fretz RI, Shaw LL. *Fieldnotes in ethnographic research (fragments de texte).*  
38 University of Chicago Press; 1995.  
39  
40  
41  
42 74. Ryan GW, Bernard HR. Data management and analysis methods. . 2000.  
43  
44  
45  
46 75. Curry LA, Nembhard IM, Bradley EH. Qualitative and mixed methods provide unique  
47 contributions to outcomes research. *Circulation.* 2009;119(10):1442-1452.  
48  
49  
50  
51  
52  
53  
54  
55  
56  
57  
58  
59

- 1  
2  
3 76. Fereday J, Muir-Cochrane E. Demonstrating rigor using thematic analysis: A hybrid  
4 approach of inductive and deductive coding and theme development. *International journal of*  
5 *qualitative methods*. 2006;5(1):80-92.  
6  
7  
8  
9  
10  
11 77. Crabtree BF, Miller WF. A template approach to text analysis: Developing and using  
12 codebooks. . 1992.  
13  
14  
15  
16  
17 78. Creswell JW. Plano--clark, V. L.(2007) designing and conducting mixed methods research. .  
18  
19  
20  
21 79. Kazdin AE, Holland L, Crowley M, Breton S. Barriers to treatment participation scale:  
22 Evaluation and validation in the context of child outpatient treatment. *Journal of Child*  
23 *Psychology and Psychiatry*. 1997;38(8):1051-1062.  
24  
25  
26  
27  
28  
29 80. Substance Abuse and Mental Health Services Administration.  
30 ***Improving Cultural Competence***. Report No.: (SMA) 14-4849. ed. Rockville, MD: Substance  
31 Abuse and Mental Health Services Administration (US); 2014.  
32  
33 <https://www.ncbi.nlm.nih.gov/books/NBK82999/>.  
34  
35  
36  
37  
38  
39 81. Brunk M, Koch J, McCall B. Report on parent satisfaction with services at community  
40 services boards. *Virginia Department of Mental Health, Mental Retardation, and Substance*  
41 *Abuse Services*. Retrieved June. 2000;8:2008.  
42  
43  
44  
45  
46  
47 82. Riley SE, Stromberg AJ, Clark J. Assessing parental satisfaction with children's mental  
48 health services with the youth services survey for families. *J Child Fam Stud*. 2005;14(1):87-99.  
49  
50  
51  
52  
53  
54  
55  
56  
57  
58  
59  
60



- 1  
2  
3 83. Shafer AB, Temple JM. Factor structure of the mental health statistics improvement program  
4 (MHSIP) family and youth satisfaction surveys. *The journal of behavioral health services &*  
5  
6 *research*. 2013;40(3):306-316.  
7  
8  
9  
10  
11 84. Larsen DL, Attkisson CC, Hargreaves WA, Nguyen TD. Assessment of client/patient  
12 satisfaction: Development of a general scale. *Eval Program Plann*. 1979;2(3):197-207.  
13  
14  
15  
16  
17 85. Attkisson CC, Zwick R. The client satisfaction questionnaire: Psychometric properties and  
18 correlations with service utilization and psychotherapy outcome. *Eval Program Plann*.  
19  
20 1982;5(3):233-237.  
21  
22  
23  
24  
25 86. Nguyen TD, Attkisson CC, Stegner BL. Assessment of patient satisfaction: Development and  
26 refinement of a service evaluation questionnaire. *Eval Program Plann*. 1983;6(3-4):299-313.  
27  
28  
29  
30  
31 87. Helfrich CD, Li Y, Sharp ND, Sales AE. Organizational readiness to change assessment  
32 (ORCA): Development of an instrument based on the promoting action on research in health  
33 services (PARIHS) framework. *Implementation Science*. 2009;4(1):38.  
34  
35  
36  
37  
38  
39 88. Reinhard SC, Gubman GD, Horwitz AV, Minsky S. Burden assessment scale for families of  
40 the seriously mentally ill. *Eval Program Plann*. 1994;17(3):261-269.  
41  
42  
43  
44  
45 89. Guada J, Land H, Han J. An exploratory factor analysis of the burden assessment scale with a  
46 sample of african-american families. *Community Ment Health J*. 2011;47(2):233-242.  
47  
48  
49  
50  
51  
52  
53  
54  
55  
56  
57  
58  
59  
60

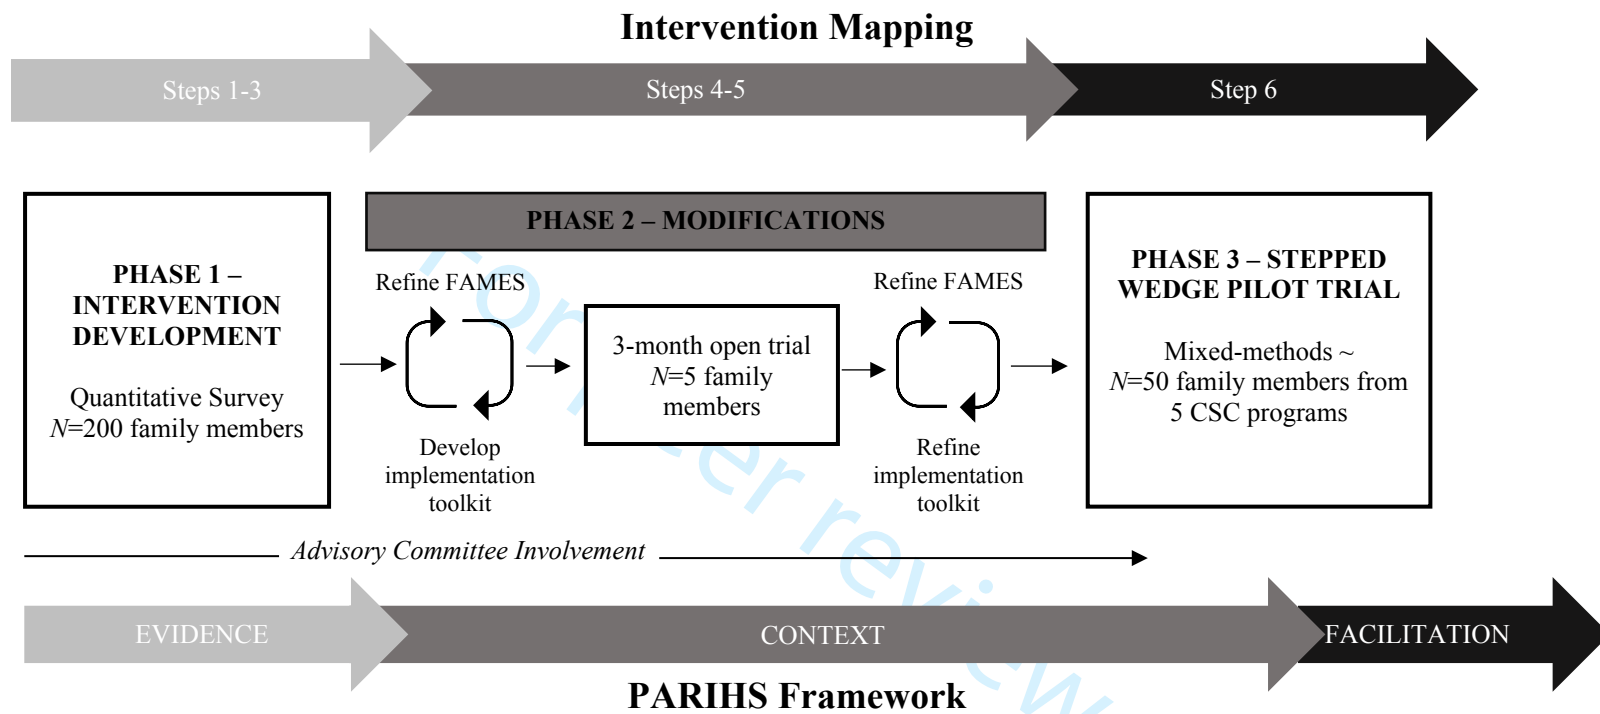

Note: Coordinated specialty care (CSC); Promoting Action on Research in Health Services (PARIHS)

**Figure 1.** Study design: Blend of intervention mapping and PARIHS framework

1  
2  
3  
4  
5  
6  
7  
8  
9  
10  
11  
12  
13  
14  
15  
16  
17  
18  
19  
20  
21  
22  
23  
24  
25  
26  
27  
28  
29  
30  
31  
32  
33  
34  
35  
36  
37  
38  
39  
40  
41  
42  
43  
44  
45  
46  
47

| Cluster       | Study Months |   |   |   |   |   |   |   |   |    |    |    |    |    |    |    |
|---------------|--------------|---|---|---|---|---|---|---|---|----|----|----|----|----|----|----|
|               | 1            | 2 | 3 | 4 | 5 | 6 | 7 | 8 | 9 | 10 | 11 | 12 | 13 | 14 | 15 | 16 |
| CSC program 1 | T            | T | I | I | I | F | F | F |   |    |    |    |    |    |    |    |
| CSC program 2 |              |   | T | T | I | I | I | F | F | F  |    |    |    |    |    |    |
| CSC program 3 |              |   |   |   | T | T | I | I | I | F  | F  | F  |    |    |    |    |
| CSC program 4 |              |   |   |   |   |   | T | T | I | I  | I  | F  | F  | F  |    |    |
| CSC program 5 |              |   |   |   |   |   |   |   | T | T  | I  | I  | I  | F  | F  | F  |

Note: Black shading is the control period; T=implementation transition period; I= Intervention period; F=Follow-up/Sustainability period; dark gray shading is the follow-up period

Figure 2. Modified stepped-wedge pilot trial of FAMES

For peer review only

Table 1 – Outcomes and description of measures

| Outcome                                    | Quantitative Component - Measure Description                                                                                                                                                                                                                                                                                                                                                                                                                                                                                                                                                                                                                                                                                                                                                                                                                                                                                                                                                                                                    | Qualitative Component      |
|--------------------------------------------|-------------------------------------------------------------------------------------------------------------------------------------------------------------------------------------------------------------------------------------------------------------------------------------------------------------------------------------------------------------------------------------------------------------------------------------------------------------------------------------------------------------------------------------------------------------------------------------------------------------------------------------------------------------------------------------------------------------------------------------------------------------------------------------------------------------------------------------------------------------------------------------------------------------------------------------------------------------------------------------------------------------------------------------------------|----------------------------|
| <b>Phase 1- Intervention development</b>   |                                                                                                                                                                                                                                                                                                                                                                                                                                                                                                                                                                                                                                                                                                                                                                                                                                                                                                                                                                                                                                                 |                            |
|                                            | <i>Barriers to Treatment Participation Scale</i> , <sup>79</sup> a 58-item semi-structured questionnaire that gathers information about five areas: stressors and obstacles that compete with treatment, treatment demands and issues, perceived relevance of treatment, relationship with the therapist, and critical events. The <i>Iowa Cultural Understanding Assessment (ICUA)</i> is a 25-item measure to assess clients' perception of cultural competence of the treatment agency and staff. <sup>80</sup> To assess motivation about services, an adapted version of the 19-item <i>Treatment Self-Regulation Questionnaire (TSRQ)</i> will be used. <sup>68</sup> The 26-item <i>Youth Services Survey-Families (YSS-F)</i> from the PhenX Toolkit will be used to assess satisfaction in the following domains: appropriateness, participation, cultural sensitivity, social connectedness, and outcomes. <sup>81-83</sup> Scores >3.5 in each domain indicates positive experiences. Family members' demographics will be captured. |                            |
| <b>Phase 2- Modifications</b>              |                                                                                                                                                                                                                                                                                                                                                                                                                                                                                                                                                                                                                                                                                                                                                                                                                                                                                                                                                                                                                                                 |                            |
| <b>Acceptability</b>                       | Family member participants will complete the 8-item <i>Client Satisfaction Questionnaire (CSQ-8)</i> to rate overall satisfaction. <sup>84-86</sup> Possible total scores range from 8 to 32, with higher scores indicating greater satisfaction (>23 indicates satisfaction).                                                                                                                                                                                                                                                                                                                                                                                                                                                                                                                                                                                                                                                                                                                                                                  | Semi-structured interviews |
| <b>Practicality</b>                        | Provider participants will complete a developed measure using a Likert scale to evaluate the practicality to the extent that the intervention could be implemented with the resources, time, and commitment available. The Organizational Readiness to Change Assessment (ORCA) tool consists of 77-items will be used to assess evidence assessment, contextual readiness and facilitation needs. <sup>87</sup> All items are scored on a Likert scale from 1=strongly disagree to 5=strongly agree.                                                                                                                                                                                                                                                                                                                                                                                                                                                                                                                                           |                            |
| <b>Phase 3- Stepped-wedge pilot trial</b>  |                                                                                                                                                                                                                                                                                                                                                                                                                                                                                                                                                                                                                                                                                                                                                                                                                                                                                                                                                                                                                                                 |                            |
| <i>Primary outcomes</i>                    |                                                                                                                                                                                                                                                                                                                                                                                                                                                                                                                                                                                                                                                                                                                                                                                                                                                                                                                                                                                                                                                 |                            |
| <b>Feasibility</b>                         | Provider participants will rate the appropriateness of the intervention and implementation toolkit (e.g., to what extent do you expect to be able to incorporate FAMES while working with family members? How useful were the components of the implementation toolkit?) Tracking the amount of external facilitator assistance needed to incorporate FAMES.                                                                                                                                                                                                                                                                                                                                                                                                                                                                                                                                                                                                                                                                                    | Semi-structured interviews |
| <b>Acceptability</b>                       | Family member participants will complete the CSQ-8, and the YSS-F will be used. Provider participants will rate satisfaction with toolkit and utility of individual items using a developed Likert scale.                                                                                                                                                                                                                                                                                                                                                                                                                                                                                                                                                                                                                                                                                                                                                                                                                                       | Semi-structured interviews |
| <i>Secondary outcome</i>                   |                                                                                                                                                                                                                                                                                                                                                                                                                                                                                                                                                                                                                                                                                                                                                                                                                                                                                                                                                                                                                                                 |                            |
| <b>Effectiveness</b>                       | Engagement will be assessed as the total number of contact hours with family members by email, phone, text, or in-person, and the total number of family psychoeducation appointments attended. Retention will be based on the percentage of families that dropout (family member declined or missed three consecutive appointments).                                                                                                                                                                                                                                                                                                                                                                                                                                                                                                                                                                                                                                                                                                           | Semi-structured interviews |
| <b>Motivation</b>                          | Family member participants will complete the TSRQ.                                                                                                                                                                                                                                                                                                                                                                                                                                                                                                                                                                                                                                                                                                                                                                                                                                                                                                                                                                                              |                            |
| <b>Family functioning</b>                  | Family member participants will complete the 19-item <i>Burden Assessment Scale (BAS)</i> . <sup>88,89</sup> Total possible scores range from 10 to 171 (higher scores indicating greater burden).                                                                                                                                                                                                                                                                                                                                                                                                                                                                                                                                                                                                                                                                                                                                                                                                                                              |                            |
| <b>Cultural competence</b>                 | Family member participants will complete the ICUA.                                                                                                                                                                                                                                                                                                                                                                                                                                                                                                                                                                                                                                                                                                                                                                                                                                                                                                                                                                                              |                            |
| <i>Exploratory implementation outcomes</i> |                                                                                                                                                                                                                                                                                                                                                                                                                                                                                                                                                                                                                                                                                                                                                                                                                                                                                                                                                                                                                                                 |                            |
| <b>Readiness and Facilitation</b>          | Provider participants will complete the ORCA to assess local adaptation needs and key components of PARHIS framework.                                                                                                                                                                                                                                                                                                                                                                                                                                                                                                                                                                                                                                                                                                                                                                                                                                                                                                                           | Semi-structured interviews |
| <b>Fidelity</b>                            | The percentage of all completed items on all required intervention checklists.                                                                                                                                                                                                                                                                                                                                                                                                                                                                                                                                                                                                                                                                                                                                                                                                                                                                                                                                                                  | Audio/video-recordings     |
| <b>Sustainability/Uptake</b>               | The total number of CSC programs utilizing all FAMES components and the number of programs using one or more FAMES components.                                                                                                                                                                                                                                                                                                                                                                                                                                                                                                                                                                                                                                                                                                                                                                                                                                                                                                                  |                            |

# BMJ Open

## Developing and implementing a culturally informed Family Motivational Engagement Strategy (FAMES) to increase family engagement in coordinated care programs: Mixed-methods pilot study protocol

|                                 |                                                                                                                                                                                                                                                                                                                                                                                                                                                                                                                                                                                                                                                                                  |
|---------------------------------|----------------------------------------------------------------------------------------------------------------------------------------------------------------------------------------------------------------------------------------------------------------------------------------------------------------------------------------------------------------------------------------------------------------------------------------------------------------------------------------------------------------------------------------------------------------------------------------------------------------------------------------------------------------------------------|
| Journal:                        | <i>BMJ Open</i>                                                                                                                                                                                                                                                                                                                                                                                                                                                                                                                                                                                                                                                                  |
| Manuscript ID                   | bmjopen-2020-036907.R1                                                                                                                                                                                                                                                                                                                                                                                                                                                                                                                                                                                                                                                           |
| Article Type:                   | Protocol                                                                                                                                                                                                                                                                                                                                                                                                                                                                                                                                                                                                                                                                         |
| Date Submitted by the Author:   | 18-May-2020                                                                                                                                                                                                                                                                                                                                                                                                                                                                                                                                                                                                                                                                      |
| Complete List of Authors:       | Oluwoye, Oladunni; Washington State University - Spokane, Elson S. Floyd College of Medicine<br>Dyck, Dennis; Washington State University - Spokane, Psychology<br>McPherson, Sterling; Washington State University - Spokane, Elson S. Floyd College of Medicine<br>Lewis-Fernández, Roberto; Columbia University College of Physicians and Surgeons, Department of Psychiatry<br>Compton, Michael; Columbia University College of Physicians and Surgeons,<br>McDonell, Michael; Washington State University Spokane Health Sciences, Elson S. Floyd College of Medicine<br>Cabassa, Leopoldo; Washington University in Saint Louis, George Warren Brown School of Social Work |
| <b>Primary Subject Heading</b>: | Health services research                                                                                                                                                                                                                                                                                                                                                                                                                                                                                                                                                                                                                                                         |
| Secondary Subject Heading:      | Mental health                                                                                                                                                                                                                                                                                                                                                                                                                                                                                                                                                                                                                                                                    |
| Keywords:                       | MENTAL HEALTH, Schizophrenia & psychotic disorders < PSYCHIATRY, Community child health < PAEDIATRICS                                                                                                                                                                                                                                                                                                                                                                                                                                                                                                                                                                            |
|                                 |                                                                                                                                                                                                                                                                                                                                                                                                                                                                                                                                                                                                                                                                                  |

SCHOLARONE™  
Manuscripts



I, the Submitting Author has the right to grant and does grant on behalf of all authors of the Work (as defined in the below author licence), an exclusive licence and/or a non-exclusive licence for contributions from authors who are: i) UK Crown employees; ii) where BMJ has agreed a CC-BY licence shall apply, and/or iii) in accordance with the terms applicable for US Federal Government officers or employees acting as part of their official duties; on a worldwide, perpetual, irrevocable, royalty-free basis to BMJ Publishing Group Ltd ("BMJ") its licensees and where the relevant Journal is co-owned by BMJ to the co-owners of the Journal, to publish the Work in this journal and any other BMJ products and to exploit all rights, as set out in our [licence](#).

The Submitting Author accepts and understands that any supply made under these terms is made by BMJ to the Submitting Author unless you are acting as an employee on behalf of your employer or a postgraduate student of an affiliated institution which is paying any applicable article publishing charge ("APC") for Open Access articles. Where the Submitting Author wishes to make the Work available on an Open Access basis (and intends to pay the relevant APC), the terms of reuse of such Open Access shall be governed by a Creative Commons licence – details of these licences and which [Creative Commons](#) licence will apply to this Work are set out in our licence referred to above.

Other than as permitted in any relevant BMJ Author's Self Archiving Policies, I confirm this Work has not been accepted for publication elsewhere, is not being considered for publication elsewhere and does not duplicate material already published. I confirm all authors consent to publication of this Work and authorise the granting of this licence.

1  
2  
3 Developing and implementing a culturally informed **F**amily **M**otivational **E**ngagement Strategy  
4 (FAMES) to increase family engagement in first episode psychosis programs: Mixed methods  
5 pilot study protocol  
6  
7

8 \*Oladunni Oluwoye, PhD, CHES <sup>a</sup>  
9 [oladunni.oluwoye@wsu.edu](mailto:oladunni.oluwoye@wsu.edu); (509) 368-6805  
10

11 Dennis G. Dyck, PhD <sup>b</sup>  
12 [dyck@wsu.edu](mailto:dyck@wsu.edu)  
13

14 Sterling M. McPherson, PhD <sup>a</sup>  
15 [smcpherson05@wsu.edu](mailto:smcpherson05@wsu.edu)  
16

17 Roberto Lewis-Fernández, MD <sup>c</sup>  
18 [Roberto.Lewis@nyspi.columbia.edu](mailto:Roberto.Lewis@nyspi.columbia.edu)  
19

20 Michael T. Compton, MD, MPH <sup>c</sup>  
21 [mtc2176@cumc.columbia.edu](mailto:mtc2176@cumc.columbia.edu)  
22

23 Michael G. McDonell, PhD <sup>a</sup>  
24 [mmcdonell@wsu.edu](mailto:mmcdonell@wsu.edu)  
25

26 Leopoldo J. Cabassa, PhD, MSW <sup>d</sup>  
27 [ljbass@wustl.edu](mailto:ljbass@wustl.edu)  
28

29  
30  
31 \*Corresponding Author  
32

33  
34 <sup>a</sup> Elson S. Floyd College of Medicine, Washington State University, 412 E. Spokane Falls Blvd,  
35 Spokane WA 99202  
36

37  
38 <sup>b</sup> Department of Psychology, Washington State University, PO Box 644820, Pullman WA,  
39 99164-4820  
40

41  
42 <sup>c</sup> Department of Psychiatry, Columbia University College of Physicians and Surgeons, and New  
43 York State Psychiatric Institute, New York, NY, USA  
44

45  
46 <sup>d</sup> George Warren Brown School of Social Work, Washington University in St. Louis, One  
47 Brookings Drive, Campus Box 1196, St. Louis MO, 63130  
48

49 Word count: 4000  
50

51 Tables: 1  
52

53 Figures: 2  
54

55 References: 94  
56  
57  
58  
59  
60

## ABSTRACT

**Introduction:** Despite the proven effectiveness of coordinated specialty care (CSC) programs for first-episode psychosis (FEP) in the United States, CSC programs often have low levels of engagement in family psychoeducation, and engagement of racial and ethnic minority family members is even lower than that for non-Latino white family members. The goal of this study is to develop and evaluate a culturally informed Family Motivational Engagement Strategy (FAMES) and implementation toolkit for CSC providers.

**Methods and analysis:** This protocol describes a mixed methods, multi-phase study that blends intervention mapping and the Promoting Action on Research in Health Services framework to develop, modify, and pilot-test FAMES and an accompanying implementation toolkit. Phase 1 will convene a Stakeholder Advisory Committee to inform modifications based on findings from phase 1 and 2. During phase 1, we will also recruit approximately 200 family members to complete an online survey to assess barriers and motivation to engage in treatment. Phase 2 we will recruit five family members into a three-month trial of the modified FAMES and implementation toolkit. Results will guide the advisory committee in refining the intervention and implementation toolkit. Phase 3 will involve a 16-month non-randomized, stepped-wedge trial with 50 family members from five CSC programs in community-based mental health clinics to examine the acceptability, feasibility, and initial impact of FAMES and the implementation toolkit.

**Ethics and dissemination:** This study received Institutional Review Board approval from Washington State University, protocol #17812-001. Results will be disseminated via peer review publications, presentations at national and international conferences, and to local community mental health agencies and committees.

**Keywords:** *Community mental health, Coordinated specialty care, Family engagement, First-episode psychosis, Implementation strategies, Motivation*

**Trial registration:** *ClinicalTrials.gov, NCT04188366, registered 28 December 2019,*



### Strengths and limitations of this study

- This pilot study will utilize an iterative mixed methods design to develop, implement, and evaluate a culturally sensitive FAmily Motivational Engagement Strategy (FAMES) in coordinated specialty care programs for first-episode psychosis.
- This protocol demonstrates the unique opportunity to blend intervention mapping and the Promoting Action on Research in Health Services (PARIHS) framework.
- Findings from a cross-sectional survey of family member experiences in Phase 1 will be used by a Stakeholder Advisory Committee to inform FAMES and further modified using clinician and participant feedback from Phase 2.
- Phase 3 involves a non-randomized stepped-wedge trial with coordinated specialty care programs to evaluate the acceptability and feasibility of FAMES.
- As a pilot, this study has a sample size and limited to the context of coordinated specialty care programs for first episode psychosis that limits generalizability.

## INTRODUCTION

Coordinated specialty care (CSC) programs in the U.S. ameliorate psychiatric symptoms and improve functioning and quality of life among youth and young adults experiencing first-episode psychosis (FEP).<sup>1</sup> CSC programs feature evidence-based practices such as individual or multi-group family psychoeducation.<sup>2</sup> There is considerable evidence demonstrating that family psychoeducation is associated with reduced relapse and rehospitalization, and improved functional status and family management of psychosis.<sup>3-8</sup> Family members have a key role in facilitating care and their participation in treatment is often associated with higher treatment engagement and quality of life of individuals with FEP, particularly among youth.<sup>9-16</sup> Despite evidence for the effectiveness of CSC programs and family psychoeducation, and the importance of family member involvement in mental health treatment, the implementation of family psychoeducation in CSC programs has been low and is one the most challenging components of CSC according to providers.<sup>17,18</sup> For instance, in a large clustered randomized trial of NAVIGATE, a CSC program for FEP, 69% of family members did not participate in family psychoeducation and only 29% attended five or more appointments.<sup>19,20</sup> These findings also revealed that racial/ethnic minority families engaged in treatment at lower rates than non-Hispanic whites.<sup>19</sup> We need to better understand and systematically address factors and underlying mechanisms, that affect the successful implementation of family-based interventions in mental health settings.

Previous studies suggest that low motivation and logistical, perceptual, and cultural barriers hinder treatment engagement and subsequently limit successful implementation of family interventions like family psychoeducation.<sup>13,21-31</sup> Logistical barriers include lack of financial resources, transportation problems, and inadequate clinics operation hours.<sup>32-34</sup> Perceptual and cognitive barriers include lack of interest due to religious beliefs, substantial burden, and perceived

1  
2  
3 lack of benefit.<sup>26,29,35,36</sup> At the provider level, improving providers training in cultural competence  
4 and providing culturally sensitive care increases treatment engagement and retention, while also  
5  
6 mitigating cultural and perceptual barriers.<sup>36,37</sup> Although motivation has been identified as a  
7  
8 mechanism for improving treatment engagement and retention among individuals with serious  
9  
10 mental illnesses (e.g., schizophrenia),<sup>38,39</sup> research on engagement and family motivation has been  
11  
12 limited. One study found that lower motivation was associated with greater perception of treatment  
13  
14 barriers and lower engagement among family members of youth with conduct disorder.<sup>40</sup>  
15  
16

17  
18  
19 To address logistical, perceptual, and cultural barriers to engagement, several strategies  
20  
21 and interventions have successfully improved family engagement for individuals with conduct  
22  
23 disorder,<sup>41</sup> substance use disorders,<sup>42-44</sup> and those who access school programs.<sup>45</sup> Several of these  
24  
25 studies have used techniques that enhance motivation and family engagement.<sup>41,46</sup> For example,  
26  
27 Nock and Kazdin developed the Participation Enhancement Intervention composed of three major  
28  
29 components: 1) describing the importance of treatment engagement, 2) motivational statements  
30  
31 about engagement, and 3) addressing engagement barriers.<sup>41</sup> In their randomized trial family  
32  
33 members receiving the intervention showed greater motivation and engagement than family  
34  
35 members in the control condition. Other strategies that have led to increased engagement are  
36  
37 telephone-based interventions addressing treatment barriers<sup>47,48</sup> and providing extrinsic motivators  
38  
39 (incentives) for family involvement in mental health care.<sup>45</sup>  
40  
41  
42  
43

#### 44 *Study aims/objectives*

45  
46  
47 The overarching purpose of this project is to assess the feasibility and acceptability of a  
48  
49 brief provider-led FAMily Engagement Motivational Strategy (FAMES) and its accompanying  
50  
51 implementation toolkit, and to examine its initial impact. This project has three phases: 1) survey  
52  
53 family members regarding logistical, perceptual, and cultural barriers, and motivators that  
54  
55  
56  
57  
58  
59  
60

1  
2  
3 influence engagement in CSC programs for FEP to inform modifications; 2) refine FAMES and  
4 the implementation toolkit for use in CSC programs for FEP using findings from Aim 1 and with  
5 input from key stakeholders, such as clients with FEP and their family members, CSC providers,  
6 and CSC organizational leaders; and 3) examine the feasibility, acceptability, and preliminary  
7 impact of FAMES in five CSC programs using a stepped-wedge design.  
8  
9  
10  
11  
12  
13

## 14 **METHODS AND ANALYSIS**

### 15 **Theoretical framework**

16  
17 This multi-site, mixed methods project will be completed in three phases: 1) intervention  
18 development, 2) intervention modification, and 3) efficacy evaluation using a non-randomized  
19 stepped-wedge pilot trial design (Figure 1). We will apply core components of intervention  
20 mapping (IM) and the Promoting Action on Research in Health Services (PARIHS) framework, a  
21 collaborative implementation framework (Figure 1). IM is commonly used in implementation  
22 science to iteratively develop interventions and implementation strategies that are rooted in theory  
23 and incorporate stakeholder perspectives. IM is composed of six steps: 1) problem analysis  
24 (preliminary data), 2) review of theory-based methods and practical strategies, 3) development of  
25 the intervention, 4) modification of intervention methods and strategies, 5) development of the  
26 implementation plan, and 6) evaluation.<sup>49</sup> The PARIHS framework outlines factors necessary for  
27 the successful implementation of interventions into practice and has guided implementation.  
28 PARIHS is composed of three stages:<sup>50-54</sup> 1) the evidence stage gathers information related on  
29 stakeholder experiences, needs, and preferences to inform the intervention; 2) the context stage  
30 evaluates the acceptability, feasibility, and sustainability of the intervention among stakeholders;  
31 and 3) the facilitation stage is focused on the appropriateness of the intervention and provider  
32 skills.  
33  
34  
35  
36  
37  
38  
39  
40  
41  
42  
43  
44  
45  
46  
47  
48  
49  
50  
51  
52  
53  
54  
55  
56  
57  
58  
59  
60

1  
2  
3  
4  
5  
6  
7  
8  
9  
10  
11  
12  
13  
14  
15  
16  
17  
18  
19  
20  
21  
22  
23  
24  
25  
26  
27  
28  
29  
30  
31  
32  
33  
34  
35  
36  
37  
38  
39  
40  
41  
42  
43  
44  
45  
46  
47  
48  
49  
50  
51  
52  
53  
54  
55  
56  
57  
58  
59  
60

Insert Figure 1 about here

### **Intervention components**

FAMES will involve three distinct and revolving components - early, continuous, and motivational contact - that incorporate motivational techniques previously used in other engagement interventions and constructs of the Self-Determination Theory (SDT).<sup>41,55,56</sup> The Diagnostic and Statistical Manual of Mental Disorders 5<sup>TH</sup> Edition (DSM-5) Cultural Formulation Interview (CFI) will be used to identify the unique needs of family members within the context of their culture, enhance the provider-family relationship, and personalize treatment components of family psychoeducation.<sup>57-59</sup>

*Early contact* by email, phone, or text message will occur 14, 7, and 2 days prior to the first scheduled orientation appointment for family members. To facilitate ongoing engagement, *continuous contact* between providers (e.g., a licensed mental health counselors, social workers, or case managers) and family members will be made 12 to 16 days after each family appointment. During the early and continuous contacts, providers inquire about potential barriers participation in family appointments and other CSC appointments for their loved one. Providers will assess social support systems and remind family members of upcoming appointments. The *motivational component* will occur in person once per month and occurs in sync with established monthly family psychoeducation appointments. It is anticipated that the motivational component will last a duration of approximately 20 minutes at the start of the family psychoeducation appointment. Providers discuss the barriers that were identified during the early and continuous contacts, work with family members identify pragmatic and tangible solutions to these barriers (e.g., extrinsic motivations), and develop a plan to overcome these barriers. Providers will prompt family members to create motivational statements (e.g., intrinsic motivations) that are goal-driven, with

1  
2  
3 an emphasis on overcoming these barriers and promoting continued engagement. During  
4 development and modification phases, we will identify and determine possible changes to the  
5 components and delivery of FAMES.  
6  
7  
8

### 9 10 **Implementation toolkit components**

11  
12 During phases 1 and 2, we will develop an implementation toolkit, designed to be a  
13 resource for providers to facilitate the uptake and implementation of FAMES.<sup>60</sup> We anticipate that  
14 the FAMES implementation toolkit will utilize a combination of strategies (e.g., implementation  
15 guides, fidelity checklist, audit and feedback, technical assistance, internal or external facilitators)  
16 that can be amendable to a specific CSC program.<sup>61</sup>  
17  
18  
19  
20  
21  
22

### 23 **Patient and public involvement**

24  
25 Patients, family members, and other stakeholders were not involved to the research  
26 question, study design, and outcomes measured. However, during this phases 1 and 2, a  
27 Stakeholder Advisory Committee will be convened, which will include two family members who  
28 have experience with CSC programs for FEP, a CSC provider (e.g., a licensed mental health  
29 counselor, social worker, or case manager), a former client who graduated from a CSC program,  
30 and a CSC administrator. An announcement for client and family member representatives will  
31 disseminated through listserv and CSC programs. Preference will be given to client and family  
32 representatives who identify as a racial/ethnic minority and the first author will select members  
33 who are interested and have time to dedicate to attending meetings. The Stakeholder Advisory  
34 Committee will meet via videoconference two to three times per year in phases 1 and phase 2 to  
35 aid in the modification of FAMES. Findings from all phases will be disseminated to community  
36 mental health agencies and patient and family advisory groups.  
37  
38  
39  
40  
41  
42  
43  
44  
45  
46  
47  
48  
49  
50  
51  
52

### 53 **Phase 1 – Intervention development**

### *Design*

Based on previously collected and published data that informed IM step 1 (problem analysis),<sup>19</sup> SDT was chosen as an overarching theoretical framework to ensure that the intervention's underlining mechanism of motivation is targeted by incorporating specific components, such as motivational statements, an approach consistent with IM step 2 (review of theory-based methods and practical strategies).<sup>56</sup> SDT focuses on three fundamental human needs: autonomy (choice), competence (self-efficacy), and relatedness (belonging). These are linked to a continuum of intrinsic motivations (internal drives to behave in a certain way such as core values and interests) and extrinsic motivations (external sources that result in external rewards such as awards).<sup>55</sup>

Aligned with the evidence stage of the PARIHS framework, approximately 200 family members of individuals with FEP will be recruited to complete a customized online Research Electronic Data Capture (REDCap) or paper survey instrument to identify family members' needs and barriers to treatment and underlying proximal targets of change that may not have been previously identified. During IM steps 2 and 3, the Stakeholder Advisory Committee will meet several times throughout phase 1 to develop and discuss matrices of change objectives that are based upon data from IM step 1 and are informed by survey findings. These meetings will build on the intervention components, previously described, to ensure that intervention components adequately address needs, barriers, and proximal targets of change identified from survey findings in a feasible and practical way.

### *Inclusion Criteria*

Survey eligibility criteria are: 1) aged 18 years or older; 2) family member (e.g., parent, guardian, aunt/uncle, spouse, grandparent, sibling, close friend) of an individual who has or had

1  
2  
3 received services from an early intervention or CSC program for FEP in the US. Potential  
4 participants will be required to read an overview about the survey purpose and that participation  
5 is voluntary before being directed to survey questions.  
6  
7  
8

### 9 10 *Data collection*

11  
12 Surveys will be directly entered into REDCap through an online survey link. The survey  
13 link will be distributed through national and local listservs for family member support groups and  
14 CSC programs and an emphasis will be placed on CSC providers to identify family members who  
15 have discontinued participation. Potential participants will be informed that the survey will take  
16 approximately 25 minutes to complete and a unique return code will be provided for participants  
17 who are unable to complete the entire survey in one sitting. A list of measures included in the  
18 survey are outlined in Table 1.<sup>62</sup>  
19  
20  
21  
22  
23  
24  
25  
26  
27

28 Insert Table 1 about here.  
29

### 30 31 *Data Analysis*

32  
33 Descriptive analyses will be conducted to assess family members' pathways to care,  
34 satisfaction with treatment, motivation for participation, and suggested areas for improving CSC  
35 programs. Regression analyses will be utilized to identify important components to services and  
36 to assess racial/ethnic group differences in treatment barriers, satisfaction, and motivations.  
37  
38  
39  
40  
41

## 42 **Phase 2 – Modifications**

### 43 44 *Design*

45  
46 Aligned with the context stage (pre-evaluation) of the PARIHS, FAMES and the developed  
47 implementation toolkit will be studied across a three-month time period among five family  
48 members from one CSC program using a combined quantitative and qualitative mixed methods  
49 approach.<sup>63</sup> Previous studies<sup>37</sup> that have utilized IM have ranged in sample size from 2 to 10  
50  
51  
52  
53  
54  
55  
56  
57  
58  
59  
60



1  
2  
3 between Phase 2 will include the completion of IM step 4 (modification of intervention methods  
4 and strategies) and step 5 (development of the implementation plan) using an iterative process  
5  
6 where the Stakeholder Advisory Committee will provide suggestions that will inform  
7  
8 modifications to FAMES and development of the implementation toolkit. Regularly scheduled,  
9  
10 audio-recorded Stakeholder Advisory Committee meetings will occur throughout this phase and  
11  
12 include the review of quantitative and qualitative data summaries from the three-month study.  
13  
14 Suggested modifications identified from summaries will be compiled for the Stakeholder Advisory  
15  
16 Committee to rate based on level of importance and feasibility and used to stimulate discussions  
17  
18 on steps to refine intervention objectives and components. Similar to phase 1 steps to inform  
19  
20 intervention components, the Stakeholder Advisory Committee meetings in phase 2 will also  
21  
22 develop the learning objectives for the implementation toolkit and connect these objectives to a  
23  
24 theory-based method and practical strategy that will be refined based on feedback from providers.  
25  
26  
27  
28  
29

### 30 *Setting*

31  
32  
33 During phase 2, FAMES will be studied at one CSC program within Washington State's  
34  
35 New Journeys network. New Journeys is a state-funded CSC program for FEP with nine locations  
36  
37 distributed in community mental health clinics in rural and urban settings throughout Washington  
38  
39 State.<sup>64</sup> Each New Journeys site employees four to eight mental health providers and currently  
40  
41 serves a total of 300 clients with FEP. The New Journeys network serves approximately 55%  
42  
43 racial/ethnic minorities; the average age of clients is 20 years; and 70% of clients reside with a  
44  
45 family member or caregiver.  
46  
47  
48

### 49 *Inclusion Criteria*

50  
51 Eligibility for inclusion for family member participants in phase 2 include: 1) aged 18  
52  
53 years or older; 2) one family member (e.g., parent, guardian, grandparent, sibling) of an  
54  
55  
56  
57  
58  
59  
60

1  
2  
3 individual enrolled in a Washington State CSC program; and 3) has received no more than 3  
4 months of services. Eligibility criteria for provider participants are 1) aged 18 years or older and  
5 2) employed at a Washington State CSC program for more than two months. Potential  
6 participants will be provided with a detailed explanation of the study purpose, the voluntary  
7 nature of participation, and their right to withdraw from the study at any time. Research staff will  
8 obtain informed consent captured using REDCap e-consenting procedures.  
9

### 10 11 12 *Data collection and outcomes*

13  
14  
15 To limit the burden on providers, self-reported measures for family member participants  
16 will be delivered directly to participants' mobile devices and email accounts using mobile and text  
17 message enabled capabilities linked to a customized REDCap database. Measures to assess  
18 acceptability and practicality will be collected at baseline and monthly throughout the three-month  
19 study period. We will also measure the extent to which the intervention preliminarily impacts  
20 motivation. Measures to the assess toolkit, will be completed by provider participants will  
21 completed at baseline that will inform the implementation process in real-time and after the three-  
22 month study period that will be used by the Stakeholder Advisory Committee to improve the  
23 implementation toolkit. Separate qualitative interviews will be completed by family member and  
24 provider participants at months 1 and 3 using open-ended targeted questions to solicit opinions on  
25 what components may, or may not be working, suggestions for improvement, and any lessons  
26 learned. All Stakeholder Advisory Committee meetings will be audio-recorded to capture  
27 qualitative comments. Key concepts from quantitative and qualitative data will be presented during  
28 Stakeholder Advisory Committee meetings. Suggested improvements and action items will be  
29 rated by members on the Stakeholder Advisory Committee, based on feasibility and importance.<sup>65</sup>  
30  
31 These ratings will stimulate Stakeholder Advisory Committee meeting discussion points that will  
32  
33  
34  
35  
36  
37  
38  
39  
40  
41  
42  
43  
44  
45  
46  
47  
48  
49  
50  
51  
52  
53  
54  
55  
56  
57  
58  
59  
60

1  
2  
3 modify FAMES. These data will help us make improvements to the intervention delivery in real-  
4  
5 time.  
6

### 7 *Quantitative data analysis*

8  
9  
10 Descriptive analyses will be performed to assess satisfaction, motivation, practicality and  
11  
12 implementation process. The mean score of ratings on practicality will be calculated and  
13  
14 presented to the Stakeholder Advisory Committee.  
15

### 16 *Qualitative data analysis*

17  
18  
19 All interview recordings will be transcribed verbatim and imported into NVivo 11, a  
20  
21 qualitative data management software. Due to its flexibility and ability to build on previous  
22  
23 research identified in IM step 1 and phase 1, a directed content approach was selected for qualitative  
24  
25 data analysis.<sup>66,67</sup> Using a directed approach to content analysis satisfaction and areas for  
26  
27 improvement will serve as initial pre-determined coding categories. Qualitative data gathered from  
28  
29 family member and provider participants will be coded, summarized, and presented to the  
30  
31 Stakeholder Advisory Committee. The meeting recordings will be translated into actionable plans  
32  
33 that will be re-presented to the Stakeholder Advisory Committee. To increase rigor, we will use  
34  
35 member checks to confirm findings, keep detailed notes from each meeting, and establish an audit  
36  
37 trail.<sup>68,69</sup>  
38  
39  
40  
41

## 42 **Phase 3 – Stepped-wedge design pilot trial**

### 43 *Design*

44  
45  
46 IM step 6 and the context (evaluation) and facilitation (appropriateness and skills) stage of  
47  
48 the PARIHS informs phase 3. During this phase, we will conduct a non-randomized stepped-  
49  
50 wedge pilot trial in five CSC programs in Washington State using a combined quantitative and  
51  
52 qualitative mixed methods approach.<sup>63,70</sup> Each CSC program will represent a cluster and serve as  
53  
54  
55  
56  
57  
58  
59  
60

1  
2  
3 its own control (Figure 2). A two-month implementation transition period will occur at each CSC  
4 program and during which providers will be introduced to the intervention using the  
5 implementation toolkits and trained to conduct FAMES. A 12-month open cohort design will be  
6  
7  
8 utilized to recruit approximately 50 family members during the study period.  
9  
10

11  
12 Insert Figure 2 about here.  
13

#### 14 *Setting and inclusion criteria*

15  
16 In phase 3, FAMES will roll out sequentially in five CSC programs in Washington State.  
17  
18 Inclusion criteria and consent procedures for family members and provider participants in phase 3  
19  
20 will be with the same as details in phase 2.  
21  
22

#### 23 *Data collection and outcomes*

24  
25 The *primary outcomes* to be assessed are feasibility and acceptability of FAMES and the  
26  
27 implementation toolkit. Primary outcome measures are described in detail in Table 1. The  
28  
29 *secondary outcomes* will include measures related to the preliminary impact of FAMES on family  
30  
31 engagement. These secondary outcomes will include engagement and retention, to be obtained by  
32  
33 providers and entered directly into the REDCap database.<sup>71</sup> Motivation, family functioning, and  
34  
35 cultural competence will also be captured using self-reported measures completed by family  
36  
37 members. Primary and secondary outcome measures will be collected monthly during the control  
38  
39 and intervention conditions. During the follow-up period for each program, family members will  
40  
41 complete measures related to treatment motivation and family functioning at 1- and 3-months post-  
42  
43 intervention completion. *Exploratory outcomes* include implementation outcomes (e.g.,  
44  
45 adherence, exposure, quality, differentiation, responsiveness) will be tracked and assessed by  
46  
47 external facilitators (i.e., research staff) throughout the implementation phase and during the  
48  
49 intervention condition using audio/video recordings to monitor the delivery of FAMES across all  
50  
51  
52  
53  
54  
55  
56  
57  
58  
59  
60

1  
2  
3 CSC programs. At baseline and at 1-month follow-up provider participants will complete an  
4 organizational readiness measure that will assess key components of the PARIHS.<sup>54</sup> Providers will  
5 also be asked to complete an online self-report intervention component checklist in REDCap after  
6 each contact and session.<sup>72</sup>  
7  
8  
9  
10

11  
12 Sustainability and uptake will be tracked by research staff during the follow-up period at  
13 1- and 3-months post-intervention completion. Qualitative interviews will be completed by family  
14 member and provider participants at two iteration points during the study. The first will occur 1-  
15 month post-implementation and the second during the follow-up period, 1-month post-intervention  
16 completion to assess acceptability (e.g., satisfaction, influence of intervention on engagement)  
17 feasibility, and key concepts of the PARIHS framework. Family members who discontinue study  
18 participation will be contacted asked to complete an exit interviews to assess acceptability (e.g.,  
19 reasons for discontinuation (e.g., burden of the intervention, barriers).<sup>73</sup>  
20  
21  
22  
23  
24  
25  
26  
27  
28  
29

### 30 *Sample justification*

31  
32 The sample size (n=50) was chosen based on literature regarding sample sizes for  
33 pilot/feasibility studies while remaining feasible within the context of present study.<sup>74</sup> While the  
34 trial is not designed to assess the effectiveness of FAMES the selected sample size will provide  
35 adequate power to preliminary analyses.<sup>75</sup> Accounting for an incomplete stepped-wedge design  
36 project with five clusters (i.e., community-based clinics) with an average recruitment of 10 family  
37 members per cluster, an intra cluster correlation of 0.10, and a significance level of 0.05, it is  
38 estimated that this will provide us with an estimated power of 0.84.  
39  
40  
41  
42  
43  
44  
45  
46  
47  
48

### 49 *Quantitative data analysis*

50  
51 At the completion of the stepped-wedge trial in phase 3, analyses on the intent-to-treat  
52 sample will be performed (n=50). We will conduct descriptive analyses on the primary and  
53  
54  
55  
56  
57  
58  
59  
60

1  
2  
3 secondary outcomes. We will also compare mean differences in satisfaction scores from control  
4 and intervention conditions, using independent sample t-tests. Generalized estimating equations  
5 will be used to assess differences in engagement by comparing the control and intervention  
6 conditions, while controlling for potential confounders (e.g., time, site). To assess the mediation  
7 effect of motivation, cultural sensitivity, and burden on the primary engagement and retention  
8 outcomes, we will path analytic modeling (e.g., bootstrapped confidence intervals to evaluate  
9 indirect effects). If needed, we will use maximum likelihood, multiple imputation, or other  
10 sensitivity analyses, including “missing not at random” approaches, to account for missing data.<sup>76</sup>

### 21 *Qualitative data analysis*

22  
23  
24 The phase 3 qualitative analysis will also use key concepts derived from the SDT (e.g.,  
25 autonomy, competence, relatedness, extrinsic and intrinsic motivations). Areas related to  
26 acceptability (e.g., satisfaction, intervention burden) will be utilized to develop and operationalize  
27 an initial coding scheme for data obtained from family member participants. Key concepts from  
28 the PARIHS framework such as organizational fit, relevance, range of flexibility, and style will be  
29 used to develop and operationalize the initial coding scheme for data obtained from provider  
30 participants.<sup>77</sup> Coding and analysis will be conducted independently by two coders through a series  
31 of iterative readings, noting text that corresponds to initial codes.<sup>69,78,79</sup> A kappa of 0.8 will be  
32 required for coders to code independently and codes will be continuously refined.<sup>80</sup> Notes will be  
33 used to develop a final codebook. To guard against biases of directive content analysis, an audit  
34 trail—documenting analytical decisions, analyzing cases that did not fit our coding scheme, and  
35 generating new codes not present in initial codebooks—will be maintained.<sup>68</sup>

### 51 *Mixed methods integration*

1  
2  
3 A thematic matrix will integrate qualitative and quantitative data using a side-by-side  
4 comparison to examine feasibility, acceptability, and implementation outcomes.<sup>81-83</sup> We will  
5 answer questions such as: “will the qualitative data collected from family member participants  
6 match the quantitative data collected regarding satisfaction and engagement?” Qualitative data  
7 collected from provider participants using the PARIHS framework will be used to explain  
8 quantitative data collected on fidelity measures. Barriers and facilitators identified by family  
9 members and providers will identify similarities and differences between these stakeholder groups  
10 that will be linked to provide further explanation and to help contextualize results.  
11  
12  
13  
14  
15  
16  
17  
18  
19  
20

## 21 **ETHICS AND DISSEMINATION**

22  
23  
24 Ethical approval was granted by the Washington State University Institutional Review  
25 Board (#17761). In accordance with the funders’ policies, an independent Data and Safety  
26 Monitoring Board was established to assure safety of participants and data integrity. Findings from  
27 this study will be disseminated through publications in peer-reviewed academic journals and  
28 presented at local, national, and international conferences. To disseminate results of the study  
29 across a wider audience, key findings will be communicated through social media and other media  
30 outlets.  
31  
32  
33  
34  
35  
36  
37  
38  
39

## 40 **DISCUSSION**

41  
42 Despite previous research on engagement interventions in other populations and settings,  
43 little is known about strategies to engage family members in the context of CSC programs.  
44 Research has also suggested inequities in utilization of evidence-based interventions (e.g., family  
45 psychoeducation) among racial/ethnic minorities that directly impacts successful implementation.  
46 We will utilize a mixed methods approach throughout the study to meld core components of IM  
47 and the PARIHS framework to develop, implement, and evaluate the culturally informed FAMES  
48  
49  
50  
51  
52  
53  
54  
55  
56  
57  
58  
59  
60

1  
2  
3 and implementation toolkit to address these inequities; evaluation will focus on acceptability,  
4 feasibility, and initial impact. Very little research has systematically utilized implementation  
5 science to address inequities in service utilization related to race/ethnicity within community  
6 mental health clinics. The study protocol described will actively identify and modify strategies to  
7 address logistical and cultural barriers that contribute to these inequities at the family, provider,  
8 and organizational levels. By utilizing a rigorous mixed methods approach, this study will also  
9 provide a roadmap for implementation and local adaptation that may contribute important  
10 knowledge to the field of implementation science.  
11  
12  
13  
14  
15  
16  
17  
18  
19  
20

21 This study has several strengths, including the unique components of FAMES that will  
22 incorporate the DSM-5 CFI, which has only been previously focused on the assessment of  
23 individuals will now be tailored for families. This will allow providers to integrate culturally  
24 sensitive information to increase our understanding of family-related motivators related to  
25 treatment and that can then be incorporated into treatment planning for all racial/ethnic groups.  
26 The utilization of a stepped-wedge design provides the opportunity to offer FAMES to all CSC  
27 programs included in the study. It also presents an additional opportunity to assess whether  
28 FAMES has the potential to re-engage family members who over time have disengaged. In light  
29 of these strengths and potential impacts, family members' participation may be limited for  
30 programs that receive FAMES later in the trial. We will monitor family member participation  
31 during the control period with monthly program check-ins. As a pilot study, it is important to note  
32 that overall findings are limited by sample size and generalizability. However, this pilot study  
33 includes six CSC programs in rural and urban settings that will contribute to the iterative process  
34 of refining FAMES and its implementation various settings.  
35  
36  
37  
38  
39  
40  
41  
42  
43  
44  
45  
46  
47  
48  
49  
50  
51  
52  
53  
54  
55  
56  
57  
58  
59  
60



1  
2  
3 As the mental health field seeks to better understand motivations toward treatment in order  
4  
5 to improve engagement and retention in CSC programs, this study will explore how to effectively  
6  
7 engage and motivate families from various racial/ethnic groups. If successful, our findings will  
8  
9 influence the scale up of FAMES to other CSC programs, while also potentially improving family  
10  
11 engagement in other mental health services.  
12  
13  
14  
15  
16  
17  
18  
19  
20  
21  
22  
23  
24  
25  
26  
27  
28  
29  
30  
31  
32  
33  
34  
35  
36  
37  
38  
39  
40  
41  
42  
43  
44  
45  
46  
47  
48  
49  
50  
51  
52  
53  
54  
55  
56  
57  
58  
59  
60

1  
2  
3  
4  
5  
6  
7  
8  
9  
10  
11  
12  
13  
14  
15  
16  
17  
18  
19  
20  
21  
22  
23  
24  
25  
26  
27  
28  
29  
30  
31  
32  
33  
34  
35  
36  
37  
38  
39  
40  
41  
42  
43  
44  
45  
46  
47  
48  
49  
50  
51  
52  
53  
54  
55  
56  
57  
58  
59  
60

**Acknowledgements**

We acknowledge and thank the following partners and advisors for their integral assistance in developing and implementing this study: Washington Health Care Authority.

For peer review only

## REFERENCES

1. Kane JM, Robinson DG, Schooler NR, et al. Comprehensive versus usual community care for first-episode psychosis: 2-year outcomes from the NIMH RAISE early treatment program. *Am J Psychiatry*. 2015;173(4):362-372.
2. Wright A, Browne J, Mueser KT, Cather C. Evidence-based psychosocial treatment for individuals with early psychosis. *Child and Adolescent Psychiatric Clinics*. 2019.
3. R McFarlane W, Lynch S, Melton R. Family psychoeducation in clinical high risk and first-episode psychosis. *Adolesc Psychiatry*. 2012;2(2):182-194.
4. Petrakis M, Oxley J, Bloom H. Carer psychoeducation in first-episode psychosis: Evaluation outcomes from a structured group programme. *Int J Soc Psychiatry*. 2013;59(4):391-397.
5. Coldham E, Addington J, Addington D. Medication adherence of individuals with a first episode of psychosis. *Acta Psychiatr Scand*. 2002;106(4):286-290.
6. Dixon L, Adams C, Lucksted A. Update on family psychoeducation for schizophrenia. *Schizophr Bull*. 2000;26(1):5.
7. Kreyenbuhl J, Nossel IR, Dixon LB. Disengagement from mental health treatment among individuals with schizophrenia and strategies for facilitating connections to care: A review of the literature. *Schizophr Bull*. 2009;35(4):696-703. doi: 10.1093/schbul/sbp046 [doi].
8. Dyck DG, Short RA, Hendryx MS, et al. Management of negative symptoms among patients with schizophrenia attending multiple-family groups. *Psychiatric services*. 2000;51(4):513-519.

- 1  
2  
3 9. Addington J, Collins A, McCleery A, Addington D. The role of family work in early  
4  
5 psychosis. *Schizophr Res.* 2005;79(1):77-83.  
6  
7  
8  
9 10. Marino L, Nossel I, Choi JC, et al. The RAISE connection program for early psychosis:  
10  
11 Secondary outcomes and mediators and moderators of improvement. *J Nerv Ment Dis.*  
12  
13 2015;203(5):365-371. doi: 10.1097/NMD.0000000000000293 [doi].  
14  
15  
16  
17 11. Conus P, Lambert M, Cotton S, Bonsack C, McGorry PD, Schimmelmann BG. Rate and  
18  
19 predictors of service disengagement in an epidemiological first-episode psychosis cohort.  
20  
21 *Schizophr Res.* 2010;118(1):256-263.  
22  
23  
24  
25 12. De Haan L, Peters B, Dingemans P, Wouters L, Linszen D. Attitudes of patients toward the  
26  
27 first psychotic episode and the start of treatment. *Schizophr Bull.* 2002;28(3):431-442.  
28  
29  
30  
31 13. Compton MT. Barriers to initial outpatient treatment engagement following first  
32  
33 hospitalization for a first episode of nonaffective psychosis: A descriptive case series. *J*  
34  
35 *Psychiatr Pract.* 2005;11(1):62-69. doi: 00131746-200501000-00010 [pii].  
36  
37  
38  
39 14. Compton MT, Esterberg ML, Druss BG, Walker EF, Kaslow NJ. A descriptive study of  
40  
41 pathways to care among hospitalized urban african american first-episode schizophrenia-  
42  
43 spectrum patients. *Soc Psychiatry Psychiatr Epidemiol.* 2006;41(7):566-573.  
44  
45  
46  
47 15. Oluwoye O, Cheng SC, Fraser E, Stokes B, McDonnell MG. Family experiences prior to the  
48  
49 initiation of care for first-episode psychosis: A meta-synthesis of qualitative studies. *J Child Fam*  
50  
51 *Stud.* 2019:1-12.  
52  
53  
54  
55  
56  
57  
58  
59  
60

- 1  
2  
3 16. Oluwoye O, Kriegel L, Alcover KC, Compton MT, Cabassa LJ, McDonell MG. The impact  
4 of early family contact on quality of life among non-hispanic blacks and whites in the RAISE-  
5 ETP trial. *Schizophr Res*. 2020. doi: S0920-9964(19)30574-2 [pii].  
6  
7  
8  
9  
10  
11 17. Addington J, Burnett P. Working with families in the early stages of psychosis.  
12  
13 *Psychological interventions in early psychosis.A treatment handbook*. 2004:99-116.  
14  
15  
16  
17 18. Oluwoye O, Stokes B, Stiles B, Monroe-DeVita M, McDonell MG. Understanding  
18 differences in family engagement and provider outreach in washington's new journeys first-  
19 episode psychosis program. *Psychiatry Res*. 2020:113286.  
20  
21  
22  
23  
24  
25 19. Oluwoye O, Stiles B, Monroe-DeVita M, et al. Racial-ethnic disparities in first-episode  
26 psychosis treatment outcomes from the RAISE-ETP study. *Psychiatric Services*.  
27  
28 2018;69(11):1138-1145.  
29  
30  
31  
32  
33 20. Glynn S, Gingerich S, Meyer-Kalos P, et al. T255. who participated in family work in the us  
34 raise-etp first episode sample? *Schizophr Bull*. 2018;44(Suppl 1):S216.  
35  
36  
37  
38  
39 21. Addington J, Heinsen RK, Robinson DG, et al. Duration of untreated psychosis in  
40 community treatment settings in the united states. *Psychiatric Services*. 2015;66(7):753-756.  
41  
42  
43  
44 22. Loebel AD, Lieberman JA, Alvir JM, Mayerhoff DI, Geisler SH, Szymanski SR. Duration of  
45 psychosis and outcome in first-episode schizophrenia. *Am J Psychiatry*. 1992;149(9):1183.  
46  
47  
48  
49  
50 23. Harrigan SM, McGorry P, Krstev H. Does treatment delay in first-episode psychosis really  
51 matter? *Psychol Med*. 2003;33(01):97-110.  
52  
53  
54  
55  
56  
57  
58  
59  
60

- 1  
2  
3 24. Black K, Peters L, Rui Q, Milliken H, Whitehorn D, Kopala L. Duration of untreated  
4 psychosis predicts treatment outcome in an early psychosis program. *Schizophr Res.*  
5  
6 2001;47(2):215-222.  
7  
8  
9  
10  
11 25. Morgan C, Abdul-Al R, Lappin JM, et al. Clinical and social determinants of duration of  
12 untreated psychosis in the AESOP first-episode psychosis study. *Br J Psychiatry.* 2006;189:446-  
13 452. doi: 189/5/446 [pii].  
14  
15  
16  
17  
18 26. Compton MT, Goulding SM, Gordon TL, Weiss PS, Kaslow NJ. Family-level predictors and  
19 correlates of the duration of untreated psychosis in african american first-episode patients.  
20  
21 *Schizophr Res.* 2009;115(2):338-345.  
22  
23  
24  
25  
26  
27 27. Commander M, Cochrane R, Sashidharan S, Akilu F, Wildsmith E. Mental health care for  
28 asian, black and white patients with non-affective psychoses: Pathways to the psychiatric  
29 hospital, in-patient and after-care. *Soc Psychiatry Psychiatr Epidemiol.* 1999;34(9):484-491.  
30  
31  
32  
33  
34  
35 28. Lucksted A, Essock SM, Stevenson J, et al. Client views of engagement in the RAISE  
36 connection program for early psychosis recovery. *Psychiatric Services.* 2015;66(7):699-704.  
37  
38  
39  
40  
41 29. Dixon L, McFarlane WR, Lefley H, et al. Evidence-based practices for services to families of  
42 people with psychiatric disabilities. *Psychiatric services.* 2001;52(7):903-910.  
43  
44  
45  
46  
47 30. McKay MM, Bannon WM, Jr. Engaging families in child mental health services. *Child*  
48 *Adolesc Psychiatr Clin N Am.* 2004;13(4):905-21, vii. doi: 10.1016/j.chc.2004.04.001 [doi].  
49  
50  
51  
52  
53  
54  
55  
56  
57  
58  
59  
60

- 1  
2  
3 31. Barnett ML, Davis EM, Callejas LM, et al. The development and evaluation of a natural  
4 helpers' training program to increase the engagement of urban, latina/o families in parent-child  
5 interaction therapy. *Children and Youth Services Review*. 2016;65:17-25.  
6  
7  
8  
9  
10  
11 32. Spoth R, Redmond C. Research on family engagement in preventive interventions: Toward  
12 improved use of scientific findings in primary prevention practice. *The Journal of Primary*  
13 *Prevention*. 2000;21(2):267-284.  
14  
15  
16  
17  
18  
19 33. Ofonedu ME, Belcher HM, Budhathoki C, Gross DA. Understanding barriers to initial  
20 treatment engagement among underserved families seeking mental health services. *J Child Fam*  
21 *Stud*. 2017;26(3):863-876.  
22  
23  
24  
25  
26  
27 34. Scheppers E, Van Dongen E, Dekker J, Geertzen J, Dekker J. Potential barriers to the use of  
28 health services among ethnic minorities: A review. *Fam Pract*. 2006;23(3):325-348.  
29  
30  
31  
32  
33 35. Compton MT, Kaslow NJ, Walker EF. Observations on parent/family factors that may  
34 influence the duration of untreated psychosis among african american first-episode  
35 schizophrenia-spectrum patients. *Schizophr Res*. 2004;68(2):373-385.  
36  
37  
38  
39  
40  
41 36. Fisher TL, Burnet DL, Huang ES, Chin MH, Cagney KA. Cultural leverage: Interventions  
42 using culture to narrow to narrow racial disparities in health care. *Medical Care Research and*  
43 *Review*. 2007;64(5\_suppl):243S-282S.  
44  
45  
46  
47  
48  
49 37. Cabassa LJ, Druss B, Wang Y, Lewis-Fernández R. Collaborative planning approach to  
50 inform the implementation of a healthcare manager intervention for hispanics with serious  
51 mental illness: A study protocol. *Implementation Science*. 2011;6(1):80.  
52  
53  
54  
55  
56  
57  
58  
59  
60

- 1  
2  
3 38. Jochems EC, Duivenvoorden HJ, van Dam A, van der Feltz-Cornelis, Christina M, Mulder  
4 CL. Motivation, treatment engagement and psychosocial outcomes in outpatients with severe  
5 mental illness: A test of Self-Determination theory. *International journal of methods in*  
6 *psychiatric research*. 2017;26(3):e1537.  
7  
8  
9  
10  
11  
12  
13 39. Jochems EC, Mulder CL, van Dam A, et al. Motivation and treatment engagement  
14 intervention trial (MotivaTe-IT): The effects of motivation feedback to clinicians on treatment  
15 engagement in patients with severe mental illness. *BMC Psychiatry*. 2012;12(1):209.  
16  
17  
18  
19  
20  
21 40. Nock MK, Ferriter C. Parent management of attendance and adherence in child and  
22 adolescent therapy: A conceptual and empirical review. *Clin Child Fam Psychol Rev*.  
23 2005;8(2):149-166.  
24  
25  
26  
27  
28  
29 41. Nock MK, Kazdin AE. Randomized controlled trial of a brief intervention for increasing  
30 participation in parent management training. *J Consult Clin Psychol*. 2005;73(5):872.  
31  
32  
33  
34  
35 42. Mullins SM, Suarez M, Ondersma SJ, Page MC. The impact of motivational interviewing on  
36 substance abuse treatment retention: A randomized control trial of women involved with child  
37 welfare. *J Subst Abuse Treat*. 2004;27(1):51-58.  
38  
39  
40  
41  
42  
43 43. Szapocznik J, Perez-Vidai A, Brickman AL, et al. Engaging adolescent drug abusers and  
44 their families in treatment: A strategic structural systems approach. *Annual Review of Addictions*  
45 *Research and Treatment*. 1991;1(C):331-336.  
46  
47  
48  
49  
50  
51  
52  
53  
54  
55  
56  
57  
58  
59  
60



- 1  
2  
3 44. Santisteban DA, Szapocznik J, Perez-Vidal A, Kurtines WM, Murray EJ, LaPerriere A.  
4  
5 Efficacy of intervention for engaging youth and families into treatment and some variables that  
6  
7 may contribute to differential effectiveness. *Journal of family psychology*. 1996;10(1):35.  
8  
9  
10  
11 45. Heinrichs N. The effects of two different incentives on recruitment rates of families into a  
12  
13 prevention program. *Journal of Primary Prevention*. 2006;27(4):345-365.  
14  
15  
16  
17 46. Grote NK, Swartz HA, Geibel SL, Zuckoff A, Houck PR, Frank E. A randomized controlled  
18  
19 trial of culturally relevant, brief interpersonal psychotherapy for perinatal depression. *Psychiatric*  
20  
21 *Services*. 2009;60(3):313-321.  
22  
23  
24  
25 47. McKay MM, Hibbert R, Hoagwood K, et al. Integrating evidence-based engagement  
26  
27 interventions into "real world" child mental health settings. *Brief Treatment and Crisis*  
28  
29 *Intervention*. 2004;4(2):177.  
30  
31  
32  
33 48. McKay MM, McCadam K, Gonzales JJ. Addressing the barriers to mental health services for  
34  
35 inner city children and their caretakers. *Community Ment Health J*. 1996;32(4):353-361.  
36  
37  
38  
39 49. Bartholomew LK, Parcel GS, Kok G. Intervention mapping: A process for developing theory  
40  
41 and evidence-based health education programs. *Health Education & Behavior*. 1998;25(5):545-  
42  
43 563.  
44  
45  
46  
47 50. Rycroft-Malone J. The PARIHS framework—A framework for guiding the implementation  
48  
49 of evidence-based practice. *J Nurs Care Qual*. 2004;19(4):297-304.  
50  
51  
52  
53  
54  
55  
56  
57  
58  
59  
60

- 1  
2  
3 51. Kitson AL, Rycroft-Malone J, Harvey G, McCormack B, Seers K, Titchen A. Evaluating the  
4 successful implementation of evidence into practice using the PARIHS framework: Theoretical  
5 and practical challenges. *Implementation science*. 2008;3(1):1.  
6  
7  
8  
9  
10  
11 52. Rycroft-Malone J, Bucknall T. *Models and frameworks for implementing evidence-based*  
12 *practice: Linking evidence to action*. Vol 2. John Wiley & Sons; 2011.  
13  
14  
15  
16  
17 53. Ullrich PM, Sahay A, Stetler CB. Use of implementation theory: A focus on PARIHS.  
18 *Worldviews on Evidence-Based Nursing*. 2014;11(1):26-34.  
19  
20  
21  
22  
23 54. Stetler CB, Damschroder LJ, Helfrich CD, Hagedorn HJ. A guide for applying a revised  
24 version of the PARIHS framework for implementation. *Implementation Science*. 2011;6(1):99.  
25  
26  
27  
28  
29 55. Ryan RM, Deci EL. Self-determination theory and the facilitation of intrinsic motivation,  
30 social development, and well-being. *American psychologist*. 2000;55(1):68-78.  
31  
32  
33  
34 56. Deci EL, Ryan RM. Self-determination theory. *Handbook of theories of social psychology*.  
35 2011;1(2011):416-433.  
36  
37  
38  
39  
40 57. Lewis-Fernández R, Aggarwal NK, Lam PC, et al. Feasibility, acceptability and clinical  
41 utility of the cultural formulation interview: Mixed-methods results from the DSM-5  
42 international field trial. *The British Journal of Psychiatry*. 2017;210(4):290-297.  
43  
44  
45  
46  
47  
48 58. Aggarwal NK, Desilva R, Nicasio AV, Boiler M, Lewis-Fernández R. Does the cultural  
49 formulation interview for the fifth revision of the diagnostic and statistical manual of mental  
50 disorders (DSM-5) affect medical communication? A qualitative exploratory study from the new  
51 york site. *Ethn Health*. 2015;20(1):1-28.  
52  
53  
54  
55  
56  
57  
58  
59  
60

1  
2  
3 59. Lewis-Fernández R, Aggarwal NK, Bäärnhielm S, et al. Culture and psychiatric evaluation:  
4 Operationalizing cultural formulation for DSM-5. *Psychiatry: Interpersonal and biological*  
5  
6 *processes*. 2014;77(2):130-154.  
7  
8  
9

10  
11 60. Hempel S, O'Hanlon C, Lim YW, Danz M, Larkin J, Rubenstein L. Spread tools: A  
12  
13 systematic review of components, uptake, and effectiveness of quality improvement toolkits.  
14  
15 *Implementation Science*. 2019;14(1):83.  
16  
17  
18

19 61. Powell BJ, Beidas RS, Lewis CC, et al. Methods to improve the selection and tailoring of  
20  
21 implementation strategies. *The journal of behavioral health services & research*.  
22  
23 2017;44(2):177-194.  
24  
25  
26

27 62. Harris PA, Taylor R, Thielke R, Payne J, Gonzalez N, Conde JG. Research electronic data  
28  
29 capture (REDCap)—a metadata-driven methodology and workflow process for providing  
30  
31 translational research informatics support. *J Biomed Inform*. 2009;42(2):377-381.  
32  
33  
34

35 63. Palinkas LA, Aarons GA, Horwitz S, Chamberlain P, Hurlburt M, Landsverk J. Mixed  
36  
37 method designs in implementation research. *Administration and Policy in Mental Health and*  
38  
39 *Mental Health Services Research*. 2011;38(1):44-53.  
40  
41  
42

43 64. Oluwoye O, Reneau H, Stokes B, et al. Preliminary evaluation of washington state's early  
44  
45 intervention program for first-episode psychosis. *Psychiatric Services*. 2019:appi. ps.  
46  
47 201900199.  
48  
49  
50

51 65. Waltz TJ, Powell BJ, Matthieu MM, et al. Use of concept mapping to characterize  
52  
53 relationships among implementation strategies and assess their feasibility and importance:  
54  
55  
56  
57  
58  
59  
60

1  
2  
3 Results from the expert recommendations for implementing change (ERIC) study.  
4  
5

6 *Implementation Science*. 2015;10(1):109.  
7  
8

9 66. Saldaña J. *The coding manual for qualitative researchers*. Sage; 2015.  
10  
11

12 67. Hsieh H, Shannon SE. Three approaches to qualitative content analysis. *Qual Health Res*.  
13  
14 2005;15(9):1277-1288.  
15  
16

17 68. Padgett DK. *Qualitative methods in social work research*. Vol 36. Sage Publications; 2016.  
18  
19

20 69. Miles MB, Huberman AM. *Qualitative data analysis: An expanded sourcebook*. sage; 1994.  
21  
22

23 70. Proctor EK, Knudsen KJ, Fedoravicius N, Hovmand P, Rosen A, Perron B. Implementation  
24  
25 of evidence-based practice in community behavioral health: Agency director perspectives.  
26  
27

28 *Administration and Policy in Mental Health and Mental Health Services Research*.  
29  
30 2007;34(5):479-488.  
31  
32

33 71. Ryan RM, Plant RW, O'Malley S. Initial motivations for alcohol treatment: Relations with  
34  
35 patient characteristics, treatment involvement, and dropout. *Addict Behav*. 1995;20(3):279-297.  
36  
37

38 72. Feely M, Seay KD, Lanier P, Auslander W, Kohl PL. Measuring fidelity in research studies:  
39  
40 A field guide to developing a comprehensive fidelity measurement system. *Child Adolescent Soc*  
41  
42 *Work J*. 2018;35(2):139-152.  
43  
44  
45

46 73. Sekhon M, Cartwright M, Francis JJ. Acceptability of healthcare interventions: An overview  
47  
48 of reviews and development of a theoretical framework. *BMC health services research*.  
49  
50 2017;17(1):88.  
51  
52  
53  
54  
55  
56  
57  
58  
59  
60

- 1  
2  
3 74. Billingham SA, Whitehead AL, Julious SA. An audit of sample sizes for pilot and feasibility  
4 trials being undertaken in the united kingdom registered in the united kingdom clinical research  
5 network database. *BMC medical research methodology*. 2013;13(1):104.  
6  
7  
8  
9  
10  
11 75. Hemming K, Taljaard M. Sample size calculations for stepped wedge and cluster randomised  
12 trials: A unified approach. *J Clin Epidemiol*. 2016;69:137-146.  
13  
14  
15  
16  
17 76. McPherson S, Barbosa-Leiker C, Mamey MR, McDonell M, Enders CK, Roll J. A ‘missing  
18 not at random’(MNAR) and ‘missing at random’(MAR) growth model comparison with a  
19 buprenorphine/naloxone clinical trial. *Addiction*. 2015;110(1):51-58.  
20  
21  
22  
23  
24  
25 77. Kitson A, Harvey G, McCormack B. Enabling the implementation of evidence based  
26 practice: A conceptual framework. *BMJ Quality & Safety*. 1998;7(3):149-158.  
27  
28  
29  
30  
31 78. Emerson RM, Fretz RI, Shaw LL. *Fieldnotes in ethnographic research (fragments de texte)*.  
32 University of Chicago Press; 1995.  
33  
34  
35  
36  
37 79. Ryan GW, Bernard HR. *Data management and analysis methods*. . 2000.  
38  
39  
40 80. Curry LA, Nembhard IM, Bradley EH. Qualitative and mixed methods provide unique  
41 contributions to outcomes research. *Circulation*. 2009;119(10):1442-1452.  
42  
43  
44  
45  
46 81. Fereday J, Muir-Cochrane E. Demonstrating rigor using thematic analysis: A hybrid  
47 approach of inductive and deductive coding and theme development. *International journal of*  
48 *qualitative methods*. 2006;5(1):80-92.  
49  
50  
51  
52  
53  
54  
55  
56  
57  
58  
59  
60

- 1  
2  
3 82. Crabtree BF, Miller WF. A template approach to text analysis: Developing and using  
4 codebooks. . 1992.  
5  
6  
7  
8  
9 83. Creswell JW. Plano--clark, V. L.(2007) designing and conducting mixed methods research. .  
10  
11 81.  
12  
13  
14 84. Kazdin AE, Holland L, Crowley M, Breton S. Barriers to treatment participation scale:  
15 Evaluation and validation in the context of child outpatient treatment. *Journal of Child*  
16 *Psychology and Psychiatry*. 1997;38(8):1051-1062.  
17  
18  
19  
20  
21  
22 85. Substance Abuse and Mental Health Services Administration.  
23 ***Improving Cultural Competence***. Report No.: (SMA) 14-4849. ed. Rockville, MD: Substance  
24 Abuse and Mental Health Services Administration (US); 2014.  
25  
26 <https://www.ncbi.nlm.nih.gov/books/NBK82999/>.  
27  
28  
29  
30  
31  
32  
33 86. Brunk M, Koch J, McCall B. Report on parent satisfaction with services at community  
34 services boards. *Virginia Department of Mental Health, Mental Retardation, and Substance*  
35 *Abuse Services*. Retrieved June. 2000;8:2008.  
36  
37  
38  
39  
40  
41 87. Riley SE, Stromberg AJ, Clark J. Assessing parental satisfaction with children's mental  
42 health services with the youth services survey for families. *J Child Fam Stud*. 2005;14(1):87-99.  
43  
44  
45  
46  
47 88. Shafer AB, Temple JM. Factor structure of the mental health statistics improvement program  
48 (MHSIP) family and youth satisfaction surveys. *The journal of behavioral health services &*  
49 *research*. 2013;40(3):306-316.  
50  
51  
52  
53  
54  
55  
56  
57  
58  
59  
60

- 1  
2  
3 89. Larsen DL, Attkisson CC, Hargreaves WA, Nguyen TD. Assessment of client/patient  
4 satisfaction: Development of a general scale. *Eval Program Plann.* 1979;2(3):197-207.  
5  
6  
7  
8  
9 90. Attkisson CC, Zwick R. The client satisfaction questionnaire: Psychometric properties and  
10 correlations with service utilization and psychotherapy outcome. *Eval Program Plann.*  
11  
12 1982;5(3):233-237.  
13  
14  
15  
16  
17 91. Nguyen TD, Attkisson CC, Stegner BL. Assessment of patient satisfaction: Development and  
18 refinement of a service evaluation questionnaire. *Eval Program Plann.* 1983;6(3-4):299-313.  
19  
20  
21  
22  
23 92. Helfrich CD, Li Y, Sharp ND, Sales AE. Organizational readiness to change assessment  
24 (ORCA): Development of an instrument based on the promoting action on research in health  
25 services (PARIHS) framework. *Implementation Science.* 2009;4(1):38.  
26  
27  
28  
29  
30  
31 93. Reinhard SC, Gubman GD, Horwitz AV, Minsky S. Burden assessment scale for families of  
32 the seriously mentally ill. *Eval Program Plann.* 1994;17(3):261-269.  
33  
34  
35  
36  
37 94. Guada J, Land H, Han J. An exploratory factor analysis of the burden assessment scale with a  
38 sample of african-american families. *Community Ment Health J.* 2011;47(2):233-242.  
39  
40  
41  
42  
43  
44  
45  
46  
47  
48  
49  
50  
51  
52  
53  
54  
55  
56  
57  
58  
59  
60

**Twitter**

@DrOluwoye, @DrMike\_McDonell, @LCabassa, @DrMcXursion

**Authors' contributions**

OO developed the concept, study design, and drafted the first version of the study protocol. DGD, SMM, RLF, MTC, MGM, and LJC contributed to the study design and revised subsequent versions of the study protocol. All authors have read and approved the final manuscript.

**Funding statement**

This project is funded and supported by the National Institute of Mental Health K01MH117457 awarded to OO. The content is solely the responsibility of the authors and does not necessarily represent the official views of the funding agency.

**Competing interests**

The authors declare that they have no competing interests.

**Patient consent for publication**

Not required.

**Ethics approval**

Ethics approvals for this study were obtained from the Washington State University Institutional Review Board.



Table 1 – Outcomes and description of measures

| Outcome                                    | Quantitative Component - Measure Description                                                                                                                                                                                                                                                                                                                                                                                                                                                                                                                                                                                                                                                                                                                                                                                                                                                                                                                                                                                                    | Qualitative Component      |
|--------------------------------------------|-------------------------------------------------------------------------------------------------------------------------------------------------------------------------------------------------------------------------------------------------------------------------------------------------------------------------------------------------------------------------------------------------------------------------------------------------------------------------------------------------------------------------------------------------------------------------------------------------------------------------------------------------------------------------------------------------------------------------------------------------------------------------------------------------------------------------------------------------------------------------------------------------------------------------------------------------------------------------------------------------------------------------------------------------|----------------------------|
| <b>Phase 1- Intervention development</b>   |                                                                                                                                                                                                                                                                                                                                                                                                                                                                                                                                                                                                                                                                                                                                                                                                                                                                                                                                                                                                                                                 |                            |
|                                            | <i>Barriers to Treatment Participation Scale</i> , <sup>84</sup> a 58-item semi-structured questionnaire that gathers information about five areas: stressors and obstacles that compete with treatment, treatment demands and issues, perceived relevance of treatment, relationship with the therapist, and critical events. The <i>Iowa Cultural Understanding Assessment (ICUA)</i> is a 25-item measure to assess clients' perception of cultural competence of the treatment agency and staff. <sup>85</sup> To assess motivation about services, an adapted version of the 19-item <i>Treatment Self-Regulation Questionnaire (TSRQ)</i> will be used. <sup>71</sup> The 26-item <i>Youth Services Survey-Families (YSS-F)</i> from the PhenX Toolkit will be used to assess satisfaction in the following domains: appropriateness, participation, cultural sensitivity, social connectedness, and outcomes. <sup>86-88</sup> Scores >3.5 in each domain indicates positive experiences. Family members' demographics will be captured. |                            |
| <b>Phase 2- Modifications</b>              |                                                                                                                                                                                                                                                                                                                                                                                                                                                                                                                                                                                                                                                                                                                                                                                                                                                                                                                                                                                                                                                 |                            |
| <b>Acceptability</b>                       | Family member participants will complete the 8-item <i>Client Satisfaction Questionnaire (CSQ-8)</i> to rate overall satisfaction. <sup>89,91</sup> Possible total scores range from 8 to 32, with higher scores indicating greater satisfaction (>23 indicates satisfaction).                                                                                                                                                                                                                                                                                                                                                                                                                                                                                                                                                                                                                                                                                                                                                                  | Semi-structured interviews |
| <b>Practicality</b>                        | Provider participants will complete a developed measure using a Likert scale to evaluate the practicality to the extent that the intervention could be implemented with the resources, time, and commitment available. The <i>Organizational Readiness to Change Assessment (ORCA)</i> tool consists of 77-items will be used to assess evidence assessment, contextual readiness and facilitation needs. <sup>92</sup> All items are scored on a Likert scale from 1=strongly disagree to 5=strongly agree.                                                                                                                                                                                                                                                                                                                                                                                                                                                                                                                                    |                            |
| <b>Phase 3- Stepped-wedge pilot trial</b>  |                                                                                                                                                                                                                                                                                                                                                                                                                                                                                                                                                                                                                                                                                                                                                                                                                                                                                                                                                                                                                                                 |                            |
| <i>Primary outcomes</i>                    |                                                                                                                                                                                                                                                                                                                                                                                                                                                                                                                                                                                                                                                                                                                                                                                                                                                                                                                                                                                                                                                 |                            |
| <b>Feasibility</b>                         | Provider participants will rate the appropriateness of the intervention and implementation toolkit (e.g., to what extent do you expect to be able to incorporate FAMES while working with family members? How useful were the components of the implementation toolkit?) Tracking the amount of external facilitator assistance needed to incorporate FAMES.                                                                                                                                                                                                                                                                                                                                                                                                                                                                                                                                                                                                                                                                                    | Semi-structured interviews |
| <b>Acceptability</b>                       | Family member participants will complete the CSQ-8, and the YSS-F will be used. Provider participants will rate satisfaction with toolkit and utility of individual items using a developed Likert scale.                                                                                                                                                                                                                                                                                                                                                                                                                                                                                                                                                                                                                                                                                                                                                                                                                                       | Semi-structured interviews |
| <i>Secondary outcome</i>                   |                                                                                                                                                                                                                                                                                                                                                                                                                                                                                                                                                                                                                                                                                                                                                                                                                                                                                                                                                                                                                                                 |                            |
| <b>Effectiveness</b>                       | Engagement will be assessed as the total number of contact hours with family members by email, phone, text, or in-person, and the total number of family psychoeducation appointments attended. Retention will be based on the percentage of families that dropout (family member declined or missed three consecutive appointments).                                                                                                                                                                                                                                                                                                                                                                                                                                                                                                                                                                                                                                                                                                           | Semi-structured interviews |
| <b>Motivation</b>                          | Family member participants will complete the TSRQ.                                                                                                                                                                                                                                                                                                                                                                                                                                                                                                                                                                                                                                                                                                                                                                                                                                                                                                                                                                                              |                            |
| <b>Family functioning</b>                  | Family member participants will complete the 19-item <i>Burden Assessment Scale (BAS)</i> . <sup>93,94</sup> Total possible scores range from 10 to 171 (higher scores indicating greater burden).                                                                                                                                                                                                                                                                                                                                                                                                                                                                                                                                                                                                                                                                                                                                                                                                                                              |                            |
| <b>Cultural competence</b>                 | Family member participants will complete the ICUA.                                                                                                                                                                                                                                                                                                                                                                                                                                                                                                                                                                                                                                                                                                                                                                                                                                                                                                                                                                                              |                            |
| <i>Exploratory implementation outcomes</i> |                                                                                                                                                                                                                                                                                                                                                                                                                                                                                                                                                                                                                                                                                                                                                                                                                                                                                                                                                                                                                                                 |                            |
| <b>Readiness and Facilitation</b>          | Provider participants will complete the ORCA to assess local adaptation needs and key components of PARHIS framework.                                                                                                                                                                                                                                                                                                                                                                                                                                                                                                                                                                                                                                                                                                                                                                                                                                                                                                                           | Semi-structured interviews |
| <b>Fidelity</b>                            | The percentage of all completed items on all required intervention checklists.                                                                                                                                                                                                                                                                                                                                                                                                                                                                                                                                                                                                                                                                                                                                                                                                                                                                                                                                                                  | Audio/video-recordings     |
| <b>Sustainability/Uptake</b>               | The total number of CSC programs utilizing all FAMES components and the number of programs using one or more FAMES components.                                                                                                                                                                                                                                                                                                                                                                                                                                                                                                                                                                                                                                                                                                                                                                                                                                                                                                                  |                            |

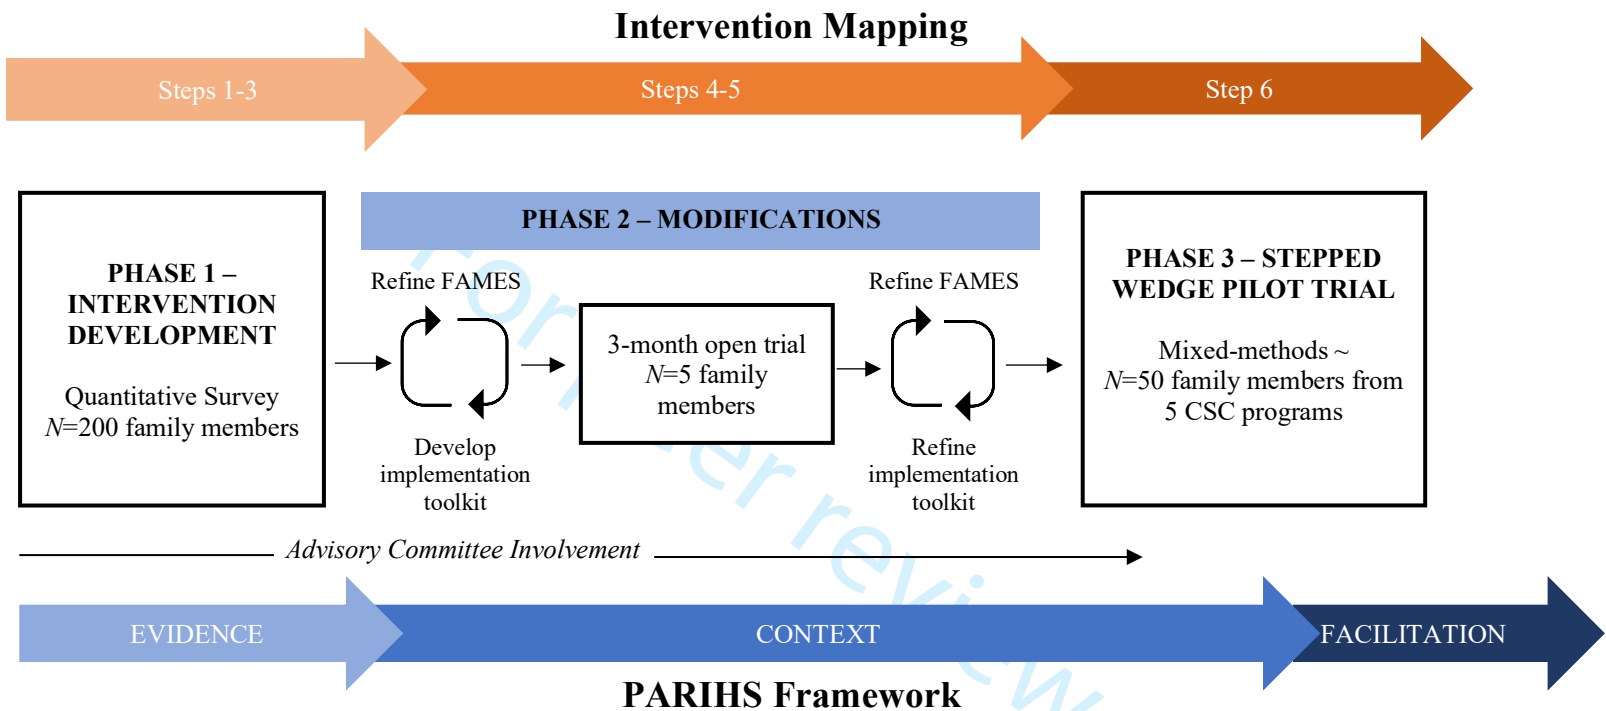

Note: Coordinated specialty care (CSC); Promoting Action on Research in Health Services (PARIHS)

Fig 1. Study design: Blend of intervention mapping and PARIHS framework

| Cluster       | Study Months |   |   |   |   |   |   |   |   |    |    |    |    |    |    |    |
|---------------|--------------|---|---|---|---|---|---|---|---|----|----|----|----|----|----|----|
|               | 1            | 2 | 3 | 4 | 5 | 6 | 7 | 8 | 9 | 10 | 11 | 12 | 13 | 14 | 15 | 16 |
| CSC program 1 | T            | T | I | I | I | F | F | F |   |    |    |    |    |    |    |    |
| CSC program 2 |              |   | T | T | I | I | I | F | F | F  |    |    |    |    |    |    |
| CSC program 3 |              |   |   |   | T | T | I | I | I | F  | F  | F  |    |    |    |    |
| CSC program 4 |              |   |   |   |   |   | T | T | I | I  | I  | F  | F  | F  |    |    |
| CSC program 5 |              |   |   |   |   |   |   |   | T | T  | I  | I  | I  | F  | F  | F  |

Note: Dark blue shading is the control period; T=implementation transition period; I= Intervention period; F=Follow-up/Sustainability period; dark gray shading is the follow-up period

**Fig 2.** Modified stepped-wedge pilot trial of FAMES
